# Supplementary material for: An electrochemical oxidative multicomponent cascade annulation of ketones and amines used to produce imidazoles
Source: Royal Society of Chemistry journal article supplement (doi:10.1039/d0gc00375a), 2020-01-01
Supplement: d0gc00375a1.pdf [file d0gc00375a1.pdf]

Electronic Supplementary Material (ESI) for Green Chemistry.

This journal is © The Royal Society of Chemistry 2017

# **An Electrochemical Oxidative Multicomponent Cascade Annulation of Ketones and Amines Used to Produce Imidazoles**

Liang Zeng <sup>a,‡</sup>, Jing Li <sup>a,‡</sup>, Jun Gao <sup>a</sup>, Xunhai Huang <sup>a</sup>, Wei Wang <sup>a</sup>,  
Xiaohui Zheng <sup>a</sup>, Lijun Gu <sup>a,b,\*</sup>, Ganpeng Li <sup>a</sup>, Shengyong Zhang <sup>a</sup>,  
Yonghui He <sup>a,\*</sup>

<sup>a</sup>Key Laboratory of Chemistry in Ethnic Medicinal Resources, State Ethnic Affairs Commission & Ministry of Education, Yunnan Minzu University, Kunming, Yunnan, 650500, China;

<sup>b</sup>Key Laboratory of Green Pesticide and Agricultural Bioengineering, Ministry of Education, Guizhou University, Guiyang 550025, China;

E-mail: gulijun2005@126.com; hee\_csu@126.com.

<sup>‡</sup>These authors made equal contribution to this work.

# Supporting Information

## List of Contents

|                                             |     |
|---------------------------------------------|-----|
| (A) Materials and equipment.....            | S2  |
| (B) Typical experimental procedure.....     | S2  |
| (C) Large-scale experimental procedure..... | S3  |
| (D) Cyclic voltammetry experiments.....     | S3  |
| (E) Analytical data.....                    | S4  |
| (F) Reference.....                          | S13 |
| (G) Spectra.....                            | S14 |

## **(A) Materials and equipment**

All glassware was oven dried at 110 °C for hours and cooled down under vacuum. Unless otherwise noted, materials were obtained from commercial suppliers and used without further purification. The instrument for electrolysis was dual display potentiostat (DJS-292B) (made in China, Figure S 1b). Both of the anode electrode and cathodic electrode were platinum plates (15 mm×15 mm×0.2 mm). Thin layer chromatography (TLC) employed glass 0.25 mm silica gel plates. Flash chromatography columns were packed with 200- 300 mesh silica gel in petroleum (bp. 60-90°C). <sup>1</sup>H and <sup>13</sup>C NMR data were recorded with Bruker Advance III (400 MHz) spectrometers with tetramethylsilane as an internal standard. All chemical shifts (δ) are reported in ppm and coupling constants (J) in Hz. All chemical shifts are reported relative to tetramethylsilane and d-solvent peaks (77.00 ppm, chloroform), respectively.

## **(B) Typical experimental procedure**

In an oven-dried undivided three-necked bottle (15 mL) equipped with a stir bar, acetophenone (0.50 mmol), benzylamine (0.5 mmol), butan-1-amine (0.75 mmol), NH<sub>4</sub>I (0.25 mmol), LiClO<sub>4</sub> (0.1 mmol) and CH<sub>3</sub>CN (10 mL) were combined and added. The bottle was equipped with platinum plate (15 mm×15 mm×0.2 mm) as the anode and platinum plate (15 mm×15 mm×0.2 mm) as the cathode and was then charged with argon (Figure S1). The reaction mixture was stirred and electrolyzed at a constant current of 9 mA for 10 hours at room temperature. When the reaction was finished, 200 - 300 mesh silica gel (1 g) was added to the reaction mixture. Evaporation of MeCN

gave the residues. The residues were purified by flash column chromatography on silica gel (petroleum ether: ethyl ether = 8:1) to give the desired product.

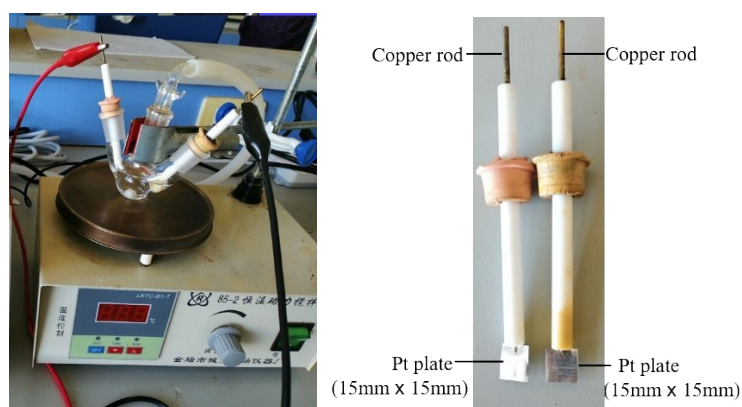

Figure S1 Electrolysis setup

### (C) Large-scale experimental procedure

In an oven-dried undivided three-necked bottle (100 mL) equipped with a stir bar, acetophenone (5.0 mmol), benzylamine (5.0 mmol), butan-1-amine (7.5 mmol),  $\text{NH}_4\text{I}$  (2.5 mmol),  $\text{LiClO}_4$  (0.1 M) and  $\text{CH}_3\text{CN}$  (65 mL) were combined and added. The bottle was equipped with platinum plate (20 mm x 20 cm x 0.2 mm) as the anode and platinum plate (20 mm x 20 cm x 0.2 mm) as the cathode and was then charged with argon. The reaction mixture was stirred and electrolyzed at a constant current of 9 mA for 20 hours at room temperature. When the reaction was finished, 200 - 300 mesh silica gel (3 g) was added to the reaction mixture. Evaporation of MeCN gave the residues. The residues were purified by flash column chromatography on silica gel (petroleum ether: ethyl ether = 8:1) to give the desired product

### (D) cyclic voltammetry experiments

Cyclic voltammetry was performed in a three-electrode cell connected to a schlenk line under nitrogen at room temperature. The working electrode was a steady glassy

carbon disk electrode, the counter electrode a platinum wire. The reference was an Ag/AgCl electrode submerged in saturated aqueous KCl solution. 10 mL of CH<sub>3</sub>CN containing 0.1 M KClO<sub>4</sub> were poured into the electrochemical cell in all experiments. The scan rate is 0.1 V/s, ranging from 0 V to 2.0 V.

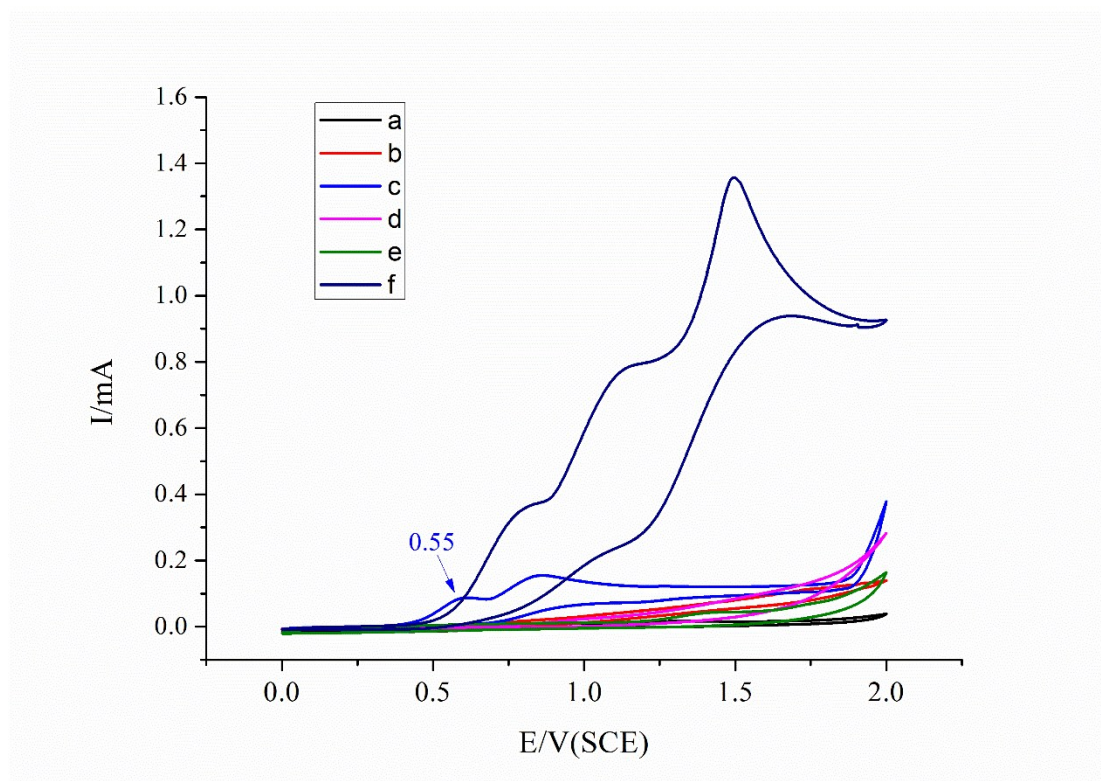

Figure S2. Cyclic voltammograms of 0.1mol L<sup>-1</sup> of LiClO<sub>4</sub> in acetonitrile (10 mL) solution containing different compounds: (a) blank experiment; (b) only n-butyl amine (0.75mmol); (c) only ammonium iodide (0.25 mmol); (d) only benzyl amine (0.5 mmol); (e) only acetophenone (0.5 mmol); (f) n-butyl amine (0.75mmol), ammonium iodide (0.25 mmol), benzyl amine (0.5 mmol), acetophenone (0.5 mmol); with a GC disk working electrode, Pt counter electrode, and SCE reference electrode at 0.1 V/s scan rate.

#### (E) Analytical data

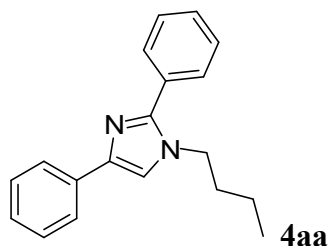

**1-butyl-2,4-diphenyl-1H-imidazole (4aa)**<sup>1</sup>: Yellow oil, 85% yield; <sup>1</sup>H NMR (400 MHz, CDCl<sub>3</sub>) δ: 7.85 (d, *J* = 7.2 Hz, 2H), 7.63 (dd, *J* = 1.6 Hz, *J* = 1.2 Hz, 2H), 7.49-7.42 (m, 3H), 7.39 (t, *J* = 7.8 Hz, 2H), 7.30 (s, 1H), 7.23 (d, *J* = 7.2 Hz, 1H), 4.01 (t, *J* = 7.4 Hz, 2H), 1.79-1.71 (m, 2H), 1.34-1.27 (m, 2H), 0.90 (t, *J* = 7.4 Hz, 3H); <sup>13</sup>C NMR (100 MHz, CDCl<sub>3</sub>) δ: 148.1, 141.1, 134.2, 130.9, 129.1, 128.8, 128.52, 128.47, 126.6, 124.8, 116.0, 46.6, 33.1, 19.7, 13.5; LRMS (EI 70 ev) *m/z* (%): 276 (M<sup>+</sup>, 100); HRMS *m/z* (ESI) calcd for C<sub>19</sub>H<sub>21</sub>N<sub>2</sub> (M+H)<sup>+</sup> 277.1699, found 277.1690.

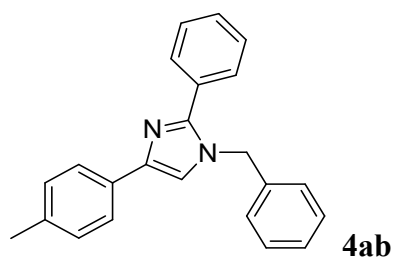

**1-benzyl-2-phenyl-4-p-tolyl-1H-imidazole (4ab)**<sup>1</sup>: yellow oil, 81% yield; <sup>1</sup>H NMR (400 MHz, CDCl<sub>3</sub>) δ: 7.74 (d, *J* = 8.4 Hz, 2H), 7.62-7.60 (m, 2H), 7.42-7.40 (m, 3H), 7.38-7.28 (m, 3H), 7.21 (s, 1H), 7.19-7.13 (m, 4H), 5.22 (s, 2H), 2.35 (s, 3H); <sup>13</sup>C NMR (100 MHz, CDCl<sub>3</sub>) δ: 148.5, 141.6, 136.9, 136.4, 131.3, 130.5, 129.2, 129.0, 129.0, 129.0, 128.6, 128.0, 126.7, 124.9, 116.4, 50.5, 21.2; LRMS (EI 70 ev) *m/z* (%): 324 (M<sup>+</sup>, 100); HRMS *m/z* (ESI) calcd for C<sub>23</sub>H<sub>21</sub>N<sub>2</sub> (M+H)<sup>+</sup> 325.1700, found 325.1708.

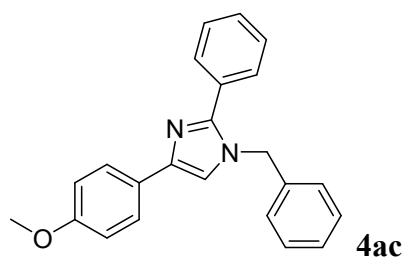

**1-benzyl-4-(4-methoxyphenyl)-2-phenyl-1H-imidazole (4ac)**<sup>1</sup>: yellow oil, 76%

yield;  $^1\text{H}$  NMR (400 MHz,  $\text{CDCl}_3$ )  $\delta$ : 7.75 (d,  $J = 8.8$  Hz, 2H), 7.60-7.58 (m, 2H), 7.40-7.39 (m, 3H), 7.33-7.29 (m, 3H), 7.24 (s, 1H), 7.13 (t,  $J = 1.6$  Hz, 2H), 6.91 (d,  $J = 2.0$  Hz, 2H), 5.18 (s, 2H), 3.80 (s, 3H);  $^{13}\text{C}$  NMR (100 MHz,  $\text{CDCl}_3$ )  $\delta$ : 158.7, 148.4, 141.4, 136.9, 130.4, 129.0, 128.94, 128.87, 127.9, 127.4, 126.6, 126.1, 115.8, 113.9, 55.2, 50.4; LRMS (EI 70 ev)  $m/z$  (%): 340 ( $\text{M}^+$ , 100); HRMS  $m/z$  (ESI) calcd for  $\text{C}_{23}\text{H}_{21}\text{N}_2\text{O}$  ( $\text{M}+\text{H}$ ) $^+$  341.1649, found 341.1658.

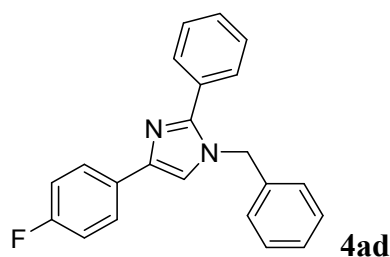

**1-benzyl-4-(4-fluorophenyl)-2-phenyl-1H-imidazole (4ad)** $^1$ : yellow oil, 69% yield;  $^1\text{H}$  NMR (400 MHz,  $\text{CDCl}_3$ )  $\delta$ : 7.81-7.77 (m, 2H), 7.61-7.59 (m, 2H), 7.44-7.41 (m, 3H), 7.37-7.32 (m, 3H), 7.19 (s, 1H), 7.17-7.13 (m, 2H), 7.05 (t,  $J = 8.0$  Hz, 2H), 5.22 (s, 2H);  $^{13}\text{C}$  NMR (100 MHz,  $\text{CDCl}_3$ )  $\delta$ : 163.2 ( $J_{\text{C-F}} = 243.8$  Hz), 148.6, 140.7, 136.7, 130.3 ( $J_{\text{C-F}} = 6.4$  Hz), 130.2, 129.07, 129.03, 129.00, 128.6, 128.0, 126.6, 126.5 ( $J_{\text{C-F}} = 7.5$  Hz), 116.4, 115.4 ( $J_{\text{C-F}} = 22.5$  Hz), 50.5; LRMS (EI 70 ev)  $m/z$  (%): 328 ( $\text{M}^+$ , 100); HRMS  $m/z$  (ESI) calcd for  $\text{C}_{22}\text{H}_{18}\text{FN}_2$  ( $\text{M}+\text{H}$ ) $^+$  329.1448, found 329.1458.

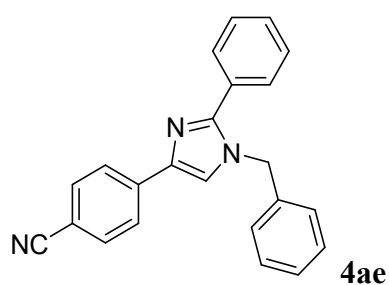

**4-(1-benzyl-2-phenyl-1H-imidazol-4-yl)benzonitrile (4ae)**: yellow oil, 65% yield;  $^1\text{H}$  NMR (400 MHz,  $\text{CDCl}_3$ )  $\delta$ : 7.91 (d,  $J = 8.4$  Hz, 2H), 7.63-7.59 (m, 4H), 7.45-7.43 (m, 3H), 7.37-7.34 (m, 4H), 7.13 (d,  $J = 8.0$  Hz, 2H), 5.23 (s, 2H);  $^{13}\text{C}$  NMR (100 MHz,  $\text{CDCl}_3$ )  $\delta$ : 149.4, 139.7, 138.6, 136.4, 132.4, 130.0, 129.4, 129.2, 129.0, 128.7, 128.3, 126.8, 125.2, 119.3, 118.6, 109.8, 50.7; LRMS (EI 70 ev)  $m/z$  (%): 335 ( $\text{M}^+$ , 100); HRMS  $m/z$  (ESI) calcd for  $\text{C}_{23}\text{H}_{18}\text{N}_3$  ( $\text{M}+\text{H}$ ) $^+$  336.1496, found 336.1488.

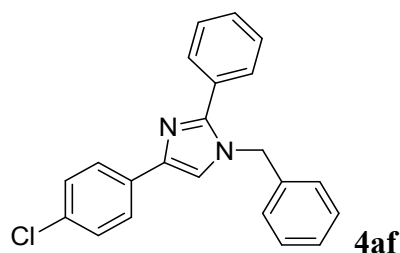

**1-benzyl-4-(4-chlorophenyl)-2-phenyl-1H-imidazole (4af) <sup>1</sup>**: brown oil, 71% yield; <sup>1</sup>H NMR (400 MHz, CDCl<sub>3</sub>) δ: 7.77 (dd, *J* = 2.0 Hz, *J* = 2.0 Hz, 2H), 7.61 (dd, *J* = 4.0 Hz, *J* = 2.0 Hz, 2H), 7.44-7.42 (m, 3H), 7.36-7.31 (m, 5H), 7.23 (s, 1H), 7.14 (d, *J* = 6.8 Hz, 2H), 5.22 (s, 2H); <sup>13</sup>C NMR (100 MHz, CDCl<sub>3</sub>) δ: 148.8, 140.5, 136.7, 132.6, 132.3, 130.3, 129.1, 129.03, 129.00, 128.7, 128.6, 128.1, 126.7, 126.2, 116.9, 50.6; LRMS (EI 70 ev) *m/z* (%): 344 (M<sup>+</sup>, 100); HRMS *m/z* (ESI) calcd for C<sub>22</sub>H<sub>18</sub>ClN<sub>2</sub> (M+H)<sup>+</sup> 345.1154, found 345.1146.

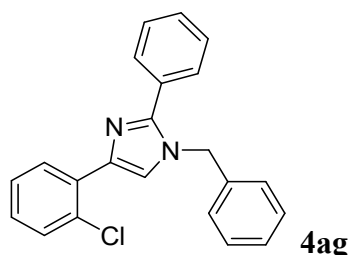

**1-benzyl-4-(2-chlorophenyl)-2-phenyl-1H-imidazole (4ag) <sup>2</sup>**: pale yellow solid, 62% yield; <sup>1</sup>H NMR (400 MHz, CDCl<sub>3</sub>) δ: 8.33 (dd, *J* = 1.6, *J* = 1.6 Hz, 1H), 7.76 (s, 1H), 7.62-7.60 (m, 2H), 7.44-7.41 (m, 4H), 7.40-7.36 (m, 1H), 7.33-7.30 (m, 2H), 7.28-7.26 (m, 2H), 7.10 (d, *J* = 3.6, 2H), 5.27 (s, 2H); <sup>13</sup>C NMR (100 MHz, CDCl<sub>3</sub>) δ: 147.5, 137.4, 136.7, 132.3, 130.7, 130.1, 129.6, 129.0, 128.9, 128.7, 128.5, 128.4, 127.9, 127.5, 127.0, 126.5, 121.6, 50.5; LRMS (EI 70 ev) *m/z* (%): 344 (M<sup>+</sup>, 100); HRMS *m/z* (ESI) calcd for C<sub>22</sub>H<sub>18</sub>ClN<sub>2</sub> (M+H)<sup>+</sup> 345.1154, found 345.1146.



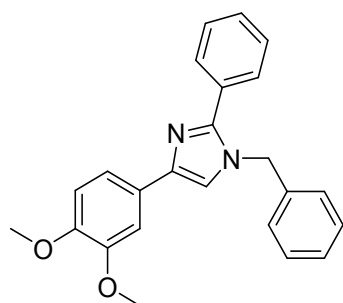

**4ah**

**1-benzyl-4-(3,4-dimethoxyphenyl)-2-phenyl-1H-imidazole (4ah)**<sup>3</sup>: yellow powder, 76% yield; <sup>1</sup>H NMR (400 MHz, CDCl<sub>3</sub>) δ: 7.63-7.60 (m, 2H), 7.46 (d, *J* = 8.0 Hz, 1H), 7.42-7.40 (m, 3H), 7.36-7.31 (m, 4H), 7.18 (s, 1H), 7.15 (d, *J* = 7.2 Hz, 2H), 6.87 (d, *J* = 8.4 Hz, 1H), 5.21 (s, 2H), 3.95 (s, 3H), 3.89 (s, 3H); <sup>13</sup>C NMR (100 MHz, CDCl<sub>3</sub>) δ: 149.1, 148.4, 148.1, 141.4, 136.9, 130.4, 129.0, 128.9, 128.6, 127.9, 127.3, 126.6, 117.2, 116.0, 111.3, 108.4, 55.9, 55.9, 50.4; LRMS (EI 70 ev) *m/z* (%): 370 (M<sup>+</sup>, 100); HRMS *m/z* (ESI) calcd for C<sub>24</sub>H<sub>23</sub>N<sub>2</sub>O<sub>2</sub> (M+H)<sup>+</sup> 371.1755, found 371.1762.

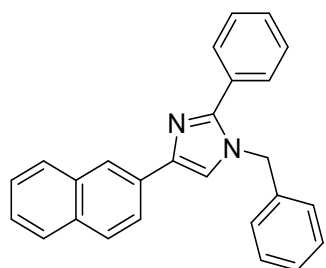

**4ai**

**1-benzyl-4-(naphthalen-3-yl)-2-phenyl-1H-imidazole (4ai)**<sup>1</sup>: brown oil, 62% yield; <sup>1</sup>H NMR (400 MHz, CDCl<sub>3</sub>) δ: 8.30 (s, 1H), 7.81-7.70 (m, 4H), 7.57-7.45 (m, 2H), 7.37-7.32 (m, 4H), 7.32-7.26 (m, 3H), 7.26-7.20 (m, 2H), 7.09-7.03 (m, 2H), 5.13 (s, 2H); <sup>13</sup>C NMR (100 MHz, CDCl<sub>3</sub>) δ: 148.9, 141.5, 136.8, 133.8, 132.6, 131.4, 130.4, 129.3, 129.1, 129.0, 128.6, 128.1, 128.04, 128.01, 127.6, 126.7, 126.0, 125.3, 123.7, 123.0, 117.3, 50.5; LRMS (EI 70 ev) *m/z* (%): 360 (M<sup>+</sup>, 100); HRMS *m/z* (ESI) calcd for C<sub>26</sub>H<sub>21</sub>N<sub>2</sub> (M+H)<sup>+</sup> 361.1700, found 361.1691.

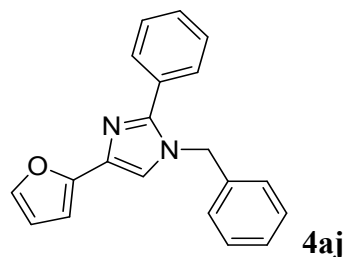

**4aj**

**1-benzyl-4-(furan-2-yl)-2-phenyl-1H-imidazole (4aj):** brown oil, 75% yield;  $^1\text{H}$  NMR (400 MHz,  $\text{CDCl}_3$ )  $\delta$ : 7.59 (dd,  $J = 3.2$  Hz,  $J = 2.8$  Hz, 2H), 7.42 (t,  $J = 3.4$  Hz, 3H), 7.37-7.32 (m, 5H), 7.19 (s, 1H), 7.13 (d,  $J = 6.4$  Hz, 2H), 6.71 (d,  $J = 3.2$  Hz, 1H), 5.20 (s, 2H);  $^{13}\text{C}$  NMR (100 MHz,  $\text{CDCl}_3$ )  $\delta$ : 149.9, 148.7, 140.9, 136.6, 134.2, 129.1, 129.07, 129.00, 128.94, 128.6, 128.0, 126.7, 116.7, 111.2, 104.4, 50.5; LRMS (EI 70 ev)  $m/z$  (%): 300 ( $\text{M}^+$ , 100); HRMS  $m/z$  (ESI) calcd for  $\text{C}_{20}\text{H}_{17}\text{N}_2\text{O}$  ( $\text{M}+\text{H}$ ) $^+$  301.1336, found 301.1329.

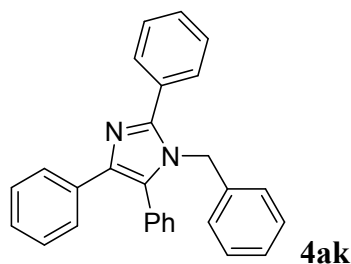

**1-benzyl-2,4,5-triphenyl-1H-imidazole (4ak) <sup>4</sup>:** white solid, 77% yield;  $^1\text{H}$  NMR (400 MHz,  $\text{CDCl}_3$ )  $\delta$ : 7.59-7.57 (m, 2H), 7.42 (t,  $J = 3.2$  Hz, 3H), 7.37-7.31 (m, 6H), 7.24 (s, 2H), 7.19 (s, 2H), 7.13 (t,  $J = 4.0$  Hz, 2H), 7.03 (d,  $J = 6.8$  Hz, 1H), 6.71 (t,  $J = 2.8$  Hz, 2H), 5.20 (s, 2H);  $^{13}\text{C}$  NMR (100 MHz,  $\text{CDCl}_3$ )  $\delta$ : 149.9, 148.7, 140.9, 136.6, 134.1, 130.1, 129.1, 129.07, 129.00, 128.9, 128.6, 128.0, 127.0, 126.7, 116.7, 111.2, 110.3, 104.4, 50.5; LRMS (EI 70 ev)  $m/z$  (%): 386 ( $\text{M}^+$ , 100); HRMS  $m/z$  (ESI) calcd for  $\text{C}_{28}\text{H}_{23}\text{N}_2$  ( $\text{M}+\text{H}$ ) $^+$  387.1855, found 387.1865.

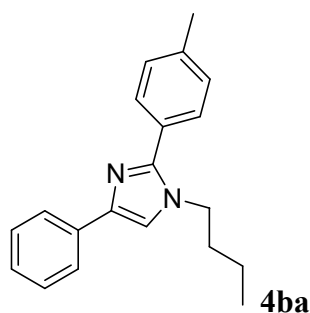

**1-butyl-4-phenyl-2-p-tolyl-1H-imidazole (4ba):** yellow oil, 78% yield;  $^1\text{H}$  NMR (400 MHz,  $\text{CDCl}_3$ )  $\delta$ : 7.51 (d,  $J = 8.0$  Hz, 3H), 7.39-7.35 (m, 3H), 7.28-7.26 (m, 2H), 7.23 (d,  $J = 8.0$  Hz, 2H), 3.99 (t,  $J = 7.6$  Hz, 2H), 1.83-1.72 (m, 2H), 1.33-1.26 (m, 2H), 0.88 (t,  $J = 8.0$  Hz, 3H);  $^{13}\text{C}$  NMR (100 MHz,  $\text{CDCl}_3$ )  $\delta$ : 148.4, 138.9, 129.7, 129.3, 129.0, 129.0, 128.5, 126.7, 126.6, 124.9, 115.9, 46.7, 33.2, 19.8, 13.6; LRMS (EI 70 ev)  $m/z$  (%): 290 ( $\text{M}^+$ , 100); HRMS  $m/z$  (ESI) calcd for  $\text{C}_{20}\text{H}_{23}\text{N}_2$  ( $\text{M}+\text{H}$ ) $^+$

291.1855, found 291.1846.

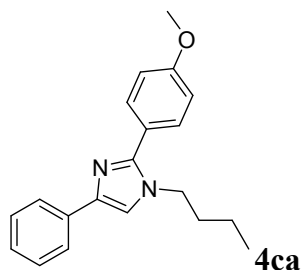

**1-butyl-2-(4-methoxyphenyl)-4-phenyl-1H-imidazole (4ca):** yellow oil, 82% yield;  $^1\text{H}$  NMR (400 MHz,  $\text{CDCl}_3$ )  $\delta$ : 7.83 (d,  $J = 7.2$  Hz, 2H), 7.55 (d,  $J = 8.4$  Hz, 2H), 7.37 (t,  $J = 8.0$  Hz, 2H), 7.28 (s, 1H), 7.23 (t,  $J = 7.2$  Hz, 1H), 3.97 (t,  $J = 7.6$  Hz, 2H), 3.86 (s, 3H), 1.79-1.71 (m, 2H), 1.35-1.25 (m, 2H), 0.88 (t,  $J = 7.2$  Hz, 3H);  $^{13}\text{C}$  NMR (100 MHz,  $\text{CDCl}_3$ )  $\delta$ : 160.0, 148.0, 140.7, 134.1, 130.4, 128.5, 126.6, 124.8, 123.1, 115.7, 113.9, 55.3, 46.6, 33.1, 19.7, 13.5; LRMS (EI 70 ev)  $m/z$  (%): 306 ( $\text{M}^+$ , 100); HRMS  $m/z$  (ESI) calcd for  $\text{C}_{20}\text{H}_{23}\text{N}_2\text{O}$  ( $\text{M}+\text{H}$ ) $^+$  307.1804, found 307.1813.

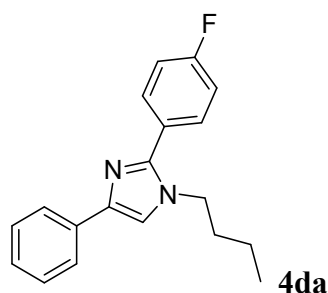

**1-butyl-2-(4-fluorophenyl)-4-phenyl-1H-imidazole (4da):** yellow powder, 75%;  $^1\text{H}$  NMR (400 MHz,  $\text{CDCl}_3$ )  $\delta$ : 7.82 (d,  $J = 7.2$  Hz, 2H), 7.62-7.58 (m, 2H), 7.37 (t,  $J = 7.6$ , 2H), 7.29 (s, 1H), 7.23 (d,  $J = 8.4$  Hz, 1H), 7.16 (t,  $J = 8.8$  Hz, 2H), 3.96 (t,  $J = 7.2$  Hz, 2H), 1.78-1.71 (m, 2H), 1.33-1.27 (m, 2H), 0.88 (t,  $J = 7.2$  Hz, 3H);  $^{13}\text{C}$  NMR (100 MHz,  $\text{CDCl}_3$ )  $\delta$ : 164.3 ( $J_{\text{C-F}} = 246$  Hz), 147.1, 141.1, 136.8, 134.1, 133.1, 131.0 ( $J_{\text{C-F}} = 8.3$  Hz), 128.6 ( $J_{\text{C-F}} = 7.2$  Hz), 126.7, 124.8, 115.8 ( $J_{\text{C-F}} = 22.1$  Hz), 46.6, 33.1, 19.7, 13.5; LRMS (EI 70 ev)  $m/z$  (%): 294 ( $\text{M}^+$ , 100); HRMS  $m/z$  (ESI) calcd for  $\text{C}_{19}\text{H}_{20}\text{FN}_2$  ( $\text{M}+\text{H}$ ) $^+$  295.1505, found 295.1513.

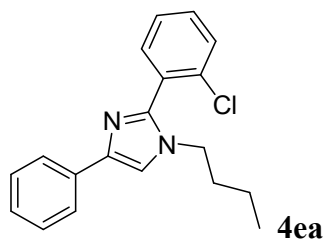

**1-butyl-2-(2-chlorophenyl)-4-phenyl-1H-imidazole (4ea):** yellow oil, 64% yield;  $^1\text{H}$  NMR (400 MHz,  $\text{CDCl}_3$ )  $\delta$ : 7.84 (dd,  $J = 1.2$  Hz,  $J = 0.8$  Hz, 2H), 7.52-7.47 (m, 2H), 7.38-7.32 (m, 4H), 7.25-7.20 (m, 2H), 3.80 (t,  $J = 7.4$  Hz, 2H), 1.70-1.62 (m, 2H), 1.26-1.19 (m, 2H), 0.83 (t,  $J = 7.4$  Hz, 3H);  $^{13}\text{C}$  NMR (100 MHz,  $\text{CDCl}_3$ )  $\delta$ : 145.4, 141.2, 134.7, 134.1, 132.7, 130.8, 130.5, 129.6, 128.5, 126.9, 126.6, 124.8, 115.1, 46.3, 32.7, 19.6, 13.4; LRMS (EI 70 ev)  $m/z$  (%): 310 ( $\text{M}^+$ , 100); HRMS  $m/z$  (ESI) calcd for  $\text{C}_{19}\text{H}_{20}\text{ClN}_2$  ( $\text{M}+\text{H}$ ) $^+$  311.1310, found 311.1318.

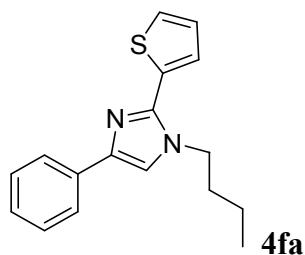

**1-butyl-4-phenyl-2-(thiophen-2-yl)-1H-imidazole (4fa):** brown powder, 75% yield;  $^1\text{H}$  NMR (400 MHz,  $\text{CDCl}_3$ )  $\delta$ : 7.83-7.81 (m, 2H), 7.41-33 (m, 4H), 7.26-7.21 (m, 2H), 7.13-7.11 (m, 1H), 4.10 (t,  $J = 8.0$  Hz, 2H), 1.86-1.78 (m, 2H), 1.44-1.35 (m, 2H), 0.94 (t,  $J = 8.0$  Hz, 3H);  $^{13}\text{C}$  NMR (100 MHz,  $\text{CDCl}_3$ )  $\delta$ : 141.9, 141.3, 134.0, 132.5, 128.5, 127.4, 126.8, 126.7, 126.6, 124.9, 116.8, 47.0, 33.0, 19.9, 13.6; LRMS (EI 70 ev)  $m/z$  (%): 285 ( $\text{M}^+$ , 100); HRMS  $m/z$  (ESI) calcd for  $\text{C}_{17}\text{H}_{19}\text{N}_2\text{S}$  ( $\text{M}+\text{H}$ ) $^+$  286.1263, found 286.1269.

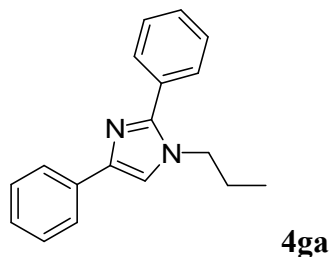

**2,4-diphenyl-1-propyl-1H-imidazole (4ga)  $^1$ :** yellow oil, 72% yield;  $^1\text{H}$  NMR (400

MHz, CDCl<sub>3</sub>)  $\delta$ : 7.85-7.83 (m, 2H), 7.64-7.61 (m, 2H), 7.47-7.43 (m, 3H), 7.38 (t,  $J$  = 7.8 Hz, 2H), 7.31 (s, 1H), 7.25-7.21(m, 1H), 3.97 (t,  $J$  = 7.6 Hz, 2H), 1.86-1.77 (m, 2H), 0.91 (t,  $J$  = 7.6 Hz, 3H); <sup>13</sup>C NMR (100 MHz, CDCl<sub>3</sub>)  $\delta$ : 148.2, 141.1, 134.2, 131.0, 129.1, 128.8, 128.6, 128.5, 126.7, 124.9, 116.0, 48.5, 24.4, 11.1; LRMS (EI 70 ev)  $m/z$  (%): 262 (M<sup>+</sup>, 100); HRMS  $m/z$  (ESI) calcd for C<sub>18</sub>H<sub>19</sub>N<sub>2</sub> (M+H)<sup>+</sup> 263.1542, found 263.1549.

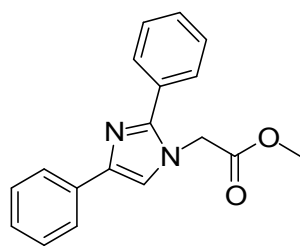

**4ha**

**methyl 2-(2,4-diphenyl-1H-imidazol-1-yl)acetate (4ha)**: yellow oil, 55% yield; <sup>1</sup>H NMR (400 MHz, CDCl<sub>3</sub>)  $\delta$ : 7.75-7.73 (m, 2H), 7.46-7.42 (m, 4H), 7.38-7.34 (m, 2H), 7.32-7.26 (m, 3H), 4.71 (s, 2H), 3.83 (s, 3H); <sup>13</sup>C NMR (100 MHz, CDCl<sub>3</sub>)  $\delta$ : 166.9, 155.0, 148.8, 135.2, 134.0, 131.1, 129.8, 128.9, 128.3, 125.1, 124.9, 115.8, 53.1, 50.0; LRMS (EI 70 ev)  $m/z$  (%): 324 (M<sup>+</sup>, 100); LRMS (EI 70 ev)  $m/z$  (%): 292 (M<sup>+</sup>, 100); HRMS  $m/z$  (ESI) calcd for C<sub>18</sub>H<sub>17</sub>N<sub>2</sub>O<sub>2</sub> (M+H)<sup>+</sup> 293.1285, found 293.1275.

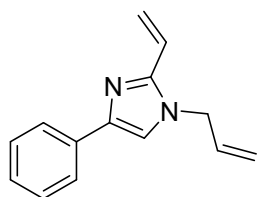

**4ia**

**1-allyl-4-phenyl-2-vinyl-1H-imidazole (4ia)**: yellow oil, 63% yield; <sup>1</sup>H NMR (400 MHz, CDCl<sub>3</sub>)  $\delta$ : 7.81 (t,  $J$  = 4.2, 2H), 7.38-7.36 (m, 2H), 7.24 (t,  $J$  = 7.4, 1H), 7.15 (s, 1H), 6.60 (dd,  $J$  = 11.2,  $J$  = 11.2, 1H), 6.29 (dd,  $J$  = 1.6,  $J$  = 1.6, 1H), 6.00-5.91 (m, 1H), 5.46 (dd,  $J$  = 1.6,  $J$  = 1.2, 1H), 5.28 (d,  $J$  = 10.0, 1H), 5.12 (d,  $J$  = 17.2, 1H), 4.59 (dt,  $J$  = 1.6,  $J$  = 1.8, 2H); <sup>13</sup>C NMR (100 MHz, CDCl<sub>3</sub>)  $\delta$ : 145.3, 141.3, 134.0, 132.6, 128.5, 126.8, 124.9, 122.6, 118.8, 117.9, 116.3, 48.3; LRMS (EI 70 ev)  $m/z$  (%): 210 (M<sup>+</sup>, 100); HRMS  $m/z$  (ESI) calcd for C<sub>14</sub>H<sub>15</sub>N<sub>2</sub> (M+H)<sup>+</sup> 211.1230, found 211.1221.

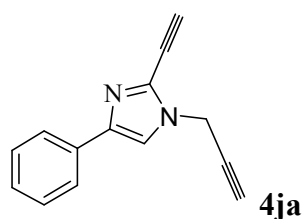

**2-ethynyl-4-phenyl-1-(prop-2-ynyl)-1H-imidazole (4ja):** yellow oil, 71% yield;  $^1\text{H}$  NMR (400 MHz,  $\text{CDCl}_3$ )  $\delta$ : 7.79 (d,  $J = 8.4$  Hz, 2H), 7.42 (s, 1H), 7.37 (t,  $J = 8.0$  Hz, 2H), 7.28 (t,  $J = 6.4$  Hz, 1H), 4.85 (d,  $J = 2.8$  Hz, 2H), 3.43 (s, 1H), 2.51 (t,  $J = 5.2$ , Hz, 1H);  $^{13}\text{C}$  NMR (100 MHz,  $\text{CDCl}_3$ )  $\delta$ : 142.5, 133.1, 130.5, 128.6, 127.4, 125.1, 115.7, 82.6, 76.2, 74.8, 72.5, 36.5; LRMS (EI 70 eV)  $m/z$  (%): 206 ( $\text{M}^+$ , 100); HRMS  $m/z$  (ESI) calcd for  $\text{C}_{14}\text{H}_{11}\text{N}_2$  ( $\text{M}+\text{H}$ ) $^+$  207.0917, found 207.0927.

#### (F) Reference

1. H. Huang; X. Ji; W. Wu; H. Jiang, *Adv. Synth. Catal.*, 2013, **355**, 170-180.
2. L. Xiang; Y. Niu; X. Pang; X. Yang; R. Yan, *Chem. Commun.*, 2015, **51**, 6598-6600.
3. C. T. F. Salfeena; R. Jalaja; R. Davis; E. Suresh; S. B. Somappa, *ACS Omega*, 2018, **3**, 8074-8082.
4. R. Sarkar; C. Mukhopadhyay, *Eur. J. Org. Chem.*, 2015, **2015**, 1246-1256.

## (G) Spectra

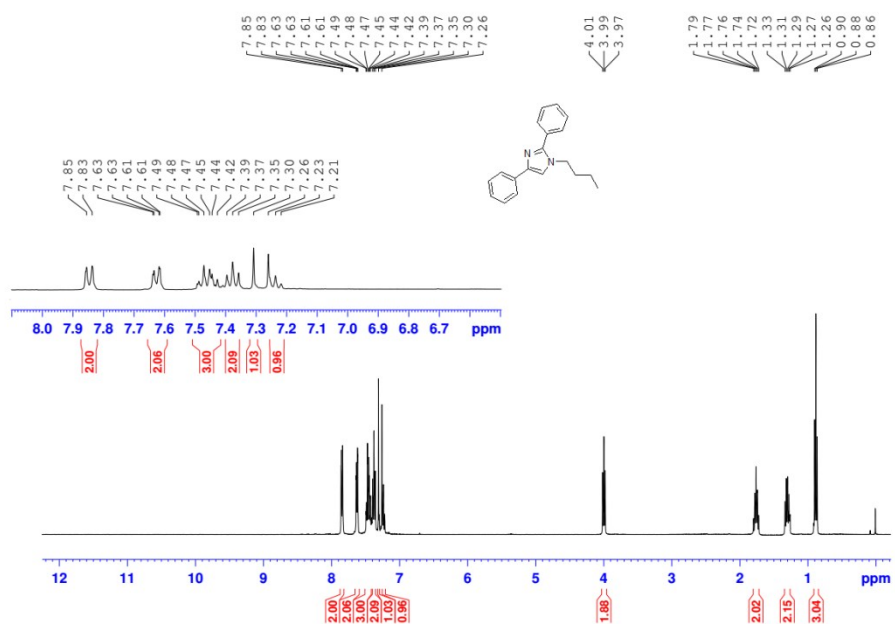

<sup>1</sup>H NMR of 4aa

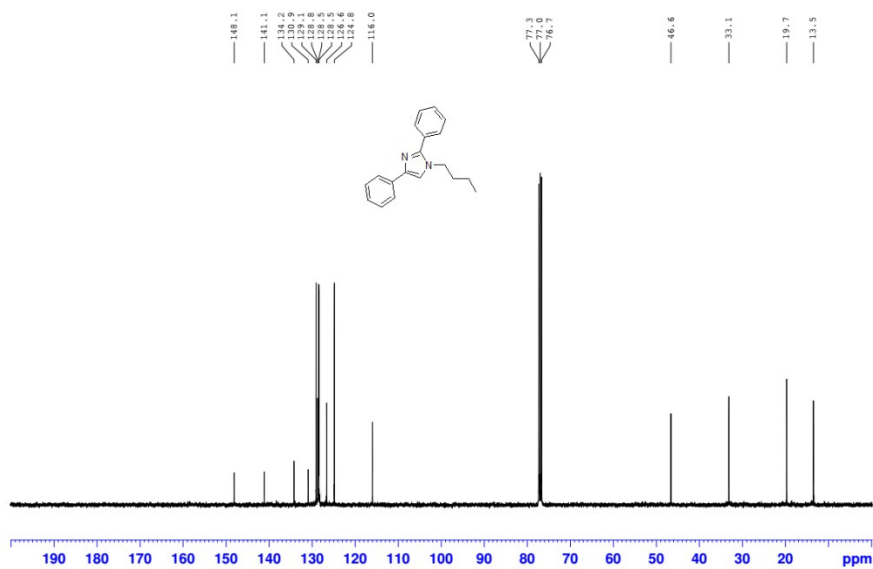

<sup>13</sup>C NMR of 4aa

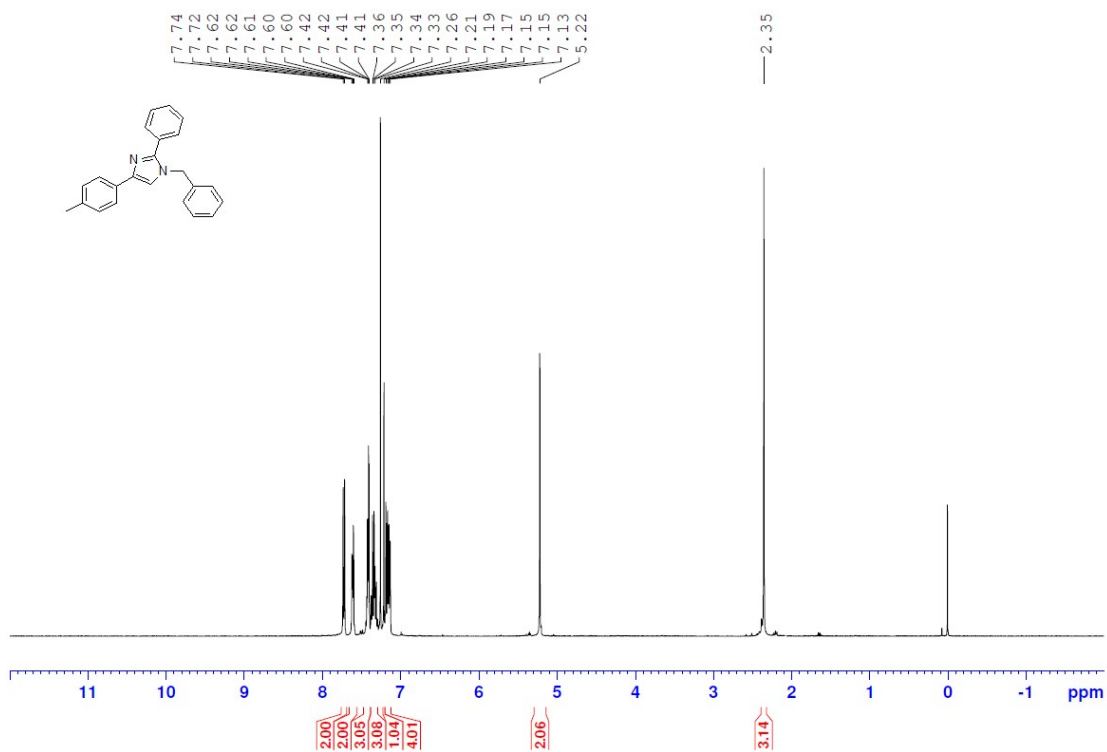

<sup>1</sup>H NMR of 4ab

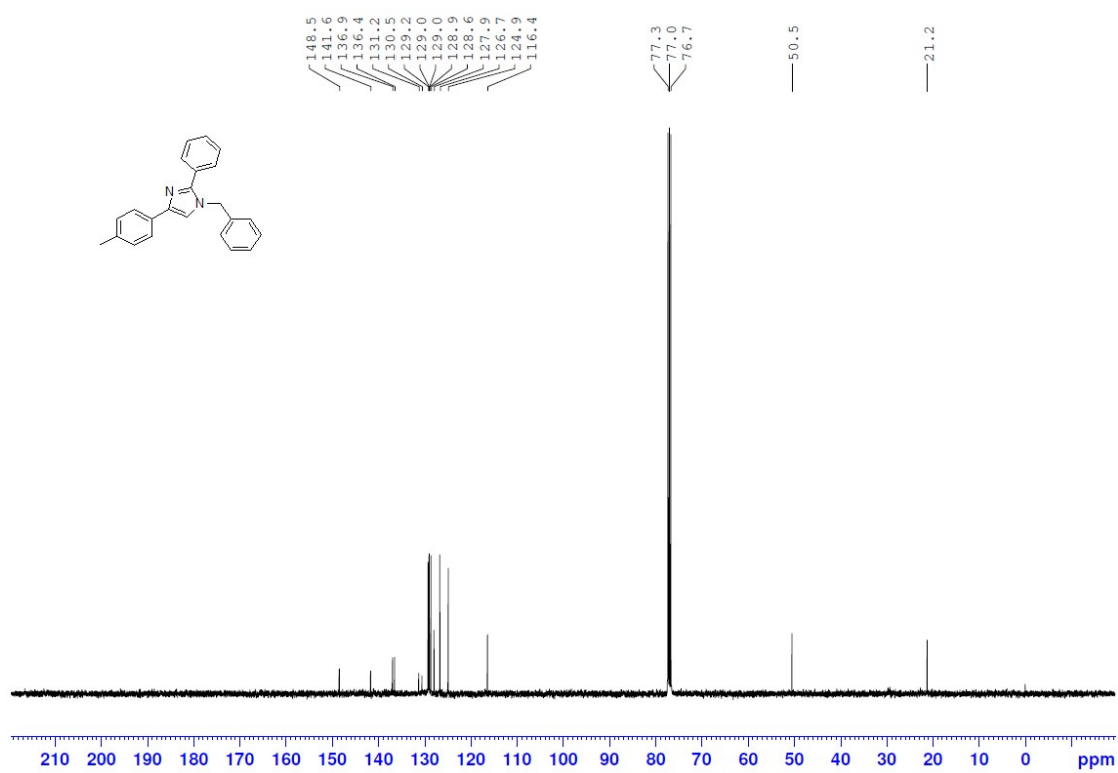

<sup>13</sup>C NMR of 4ab



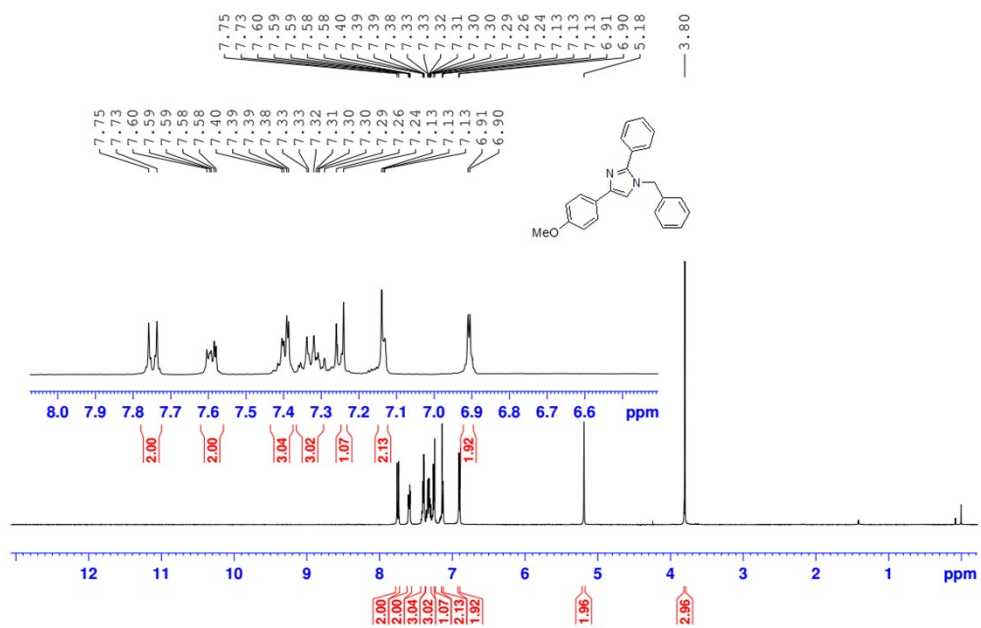

**<sup>1</sup>H NMR of 4ac**

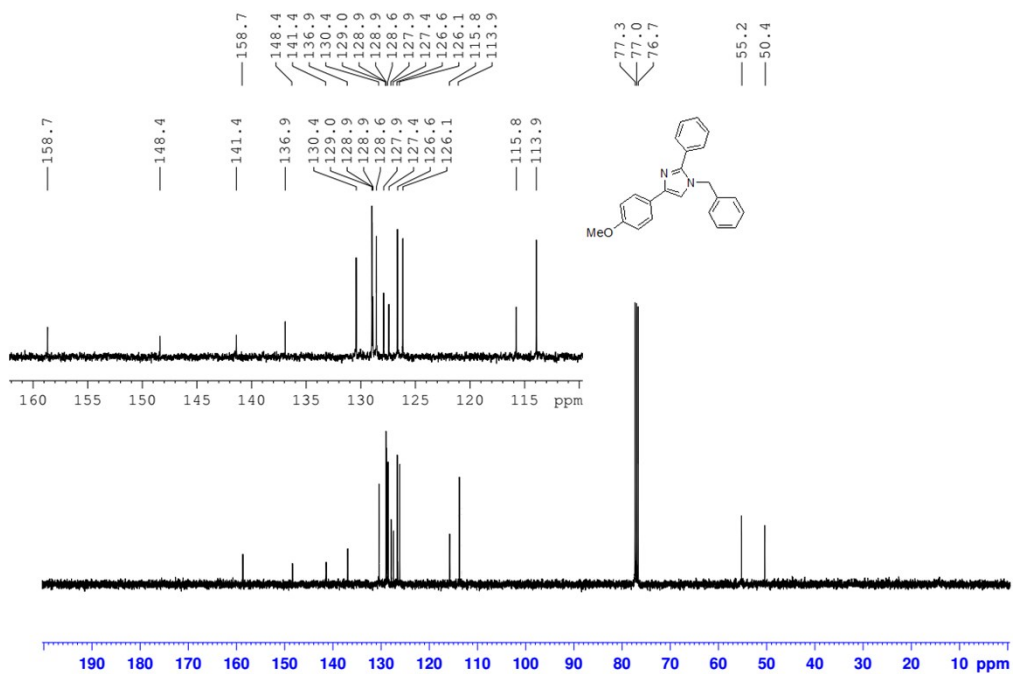

**<sup>13</sup>C NMR of 4ac**

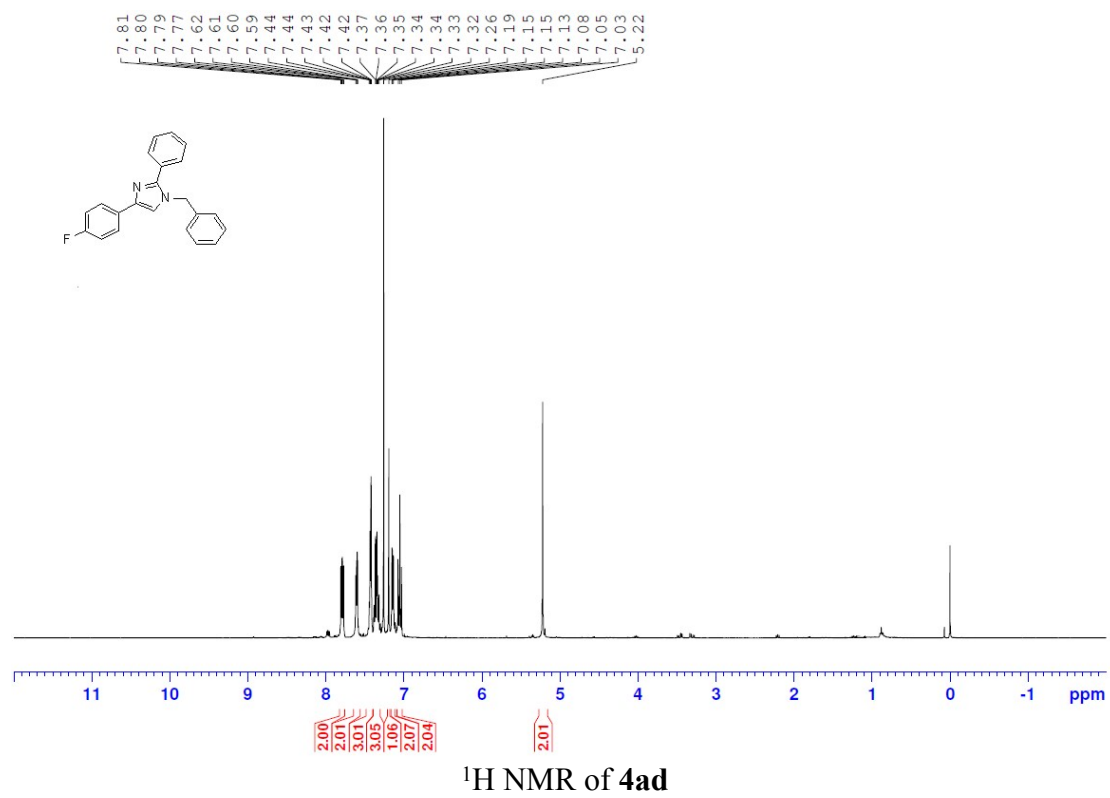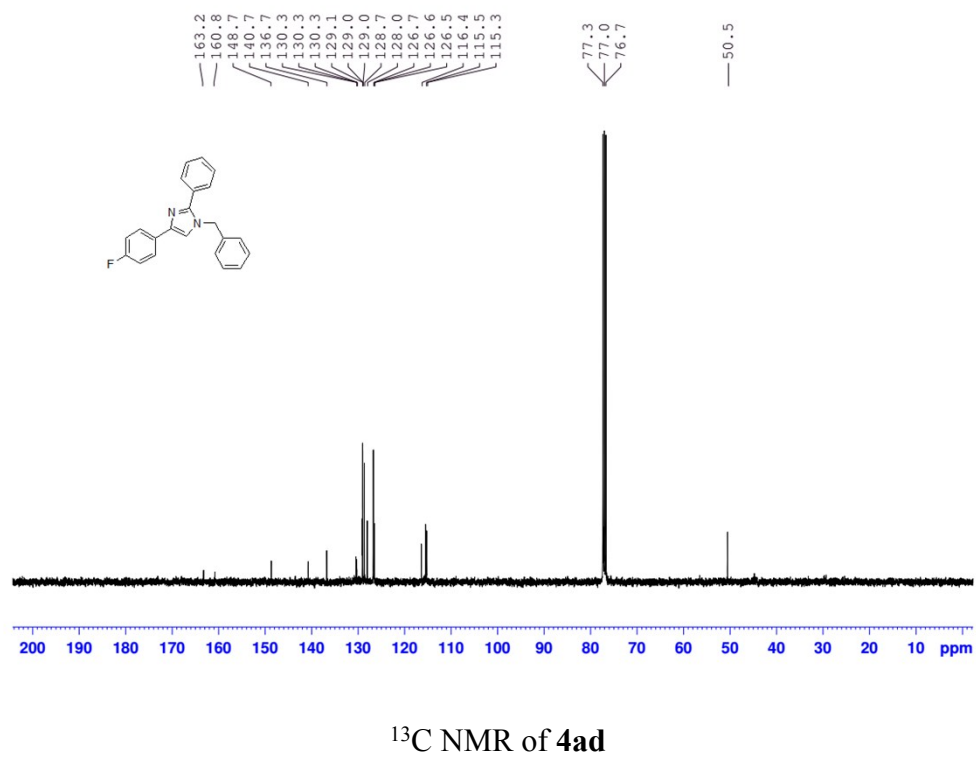

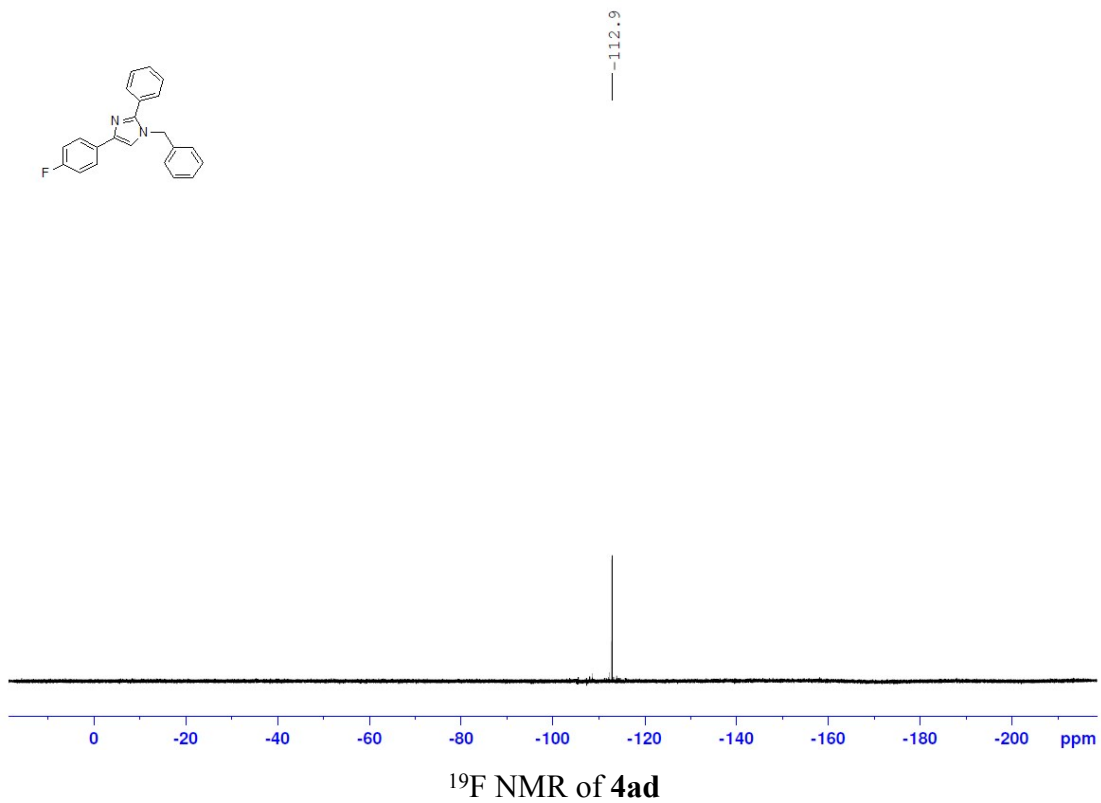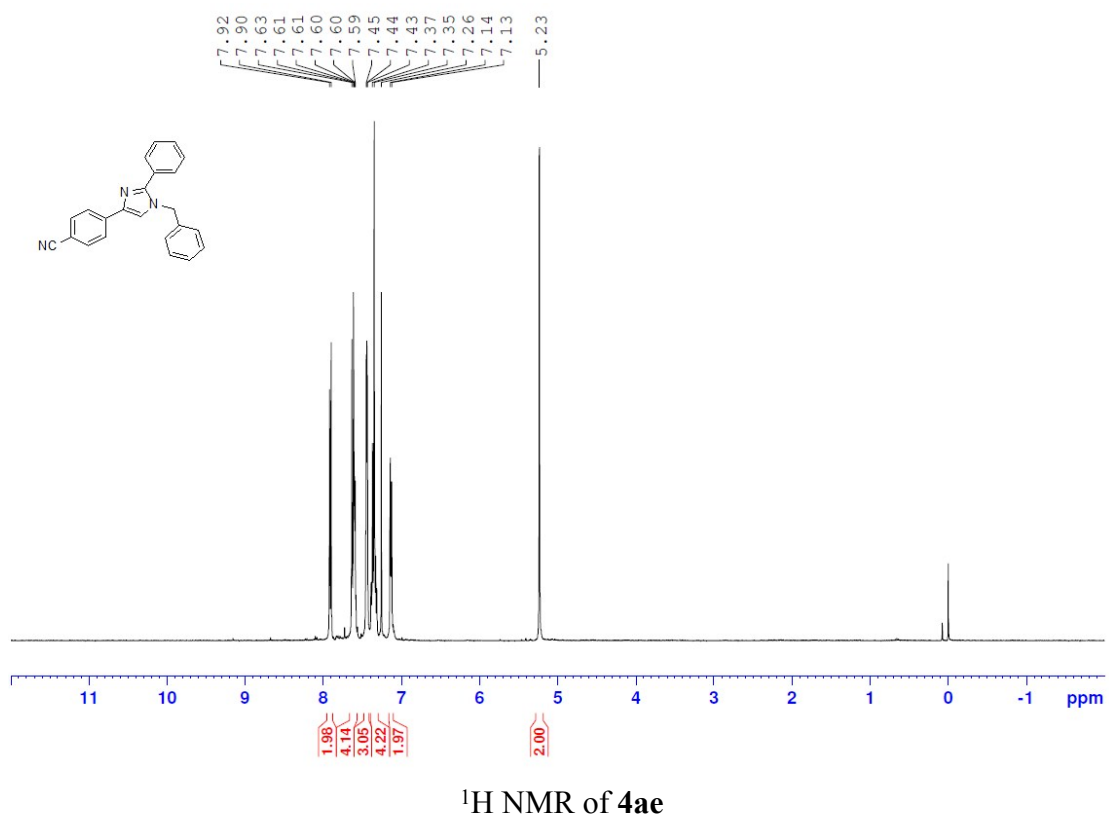

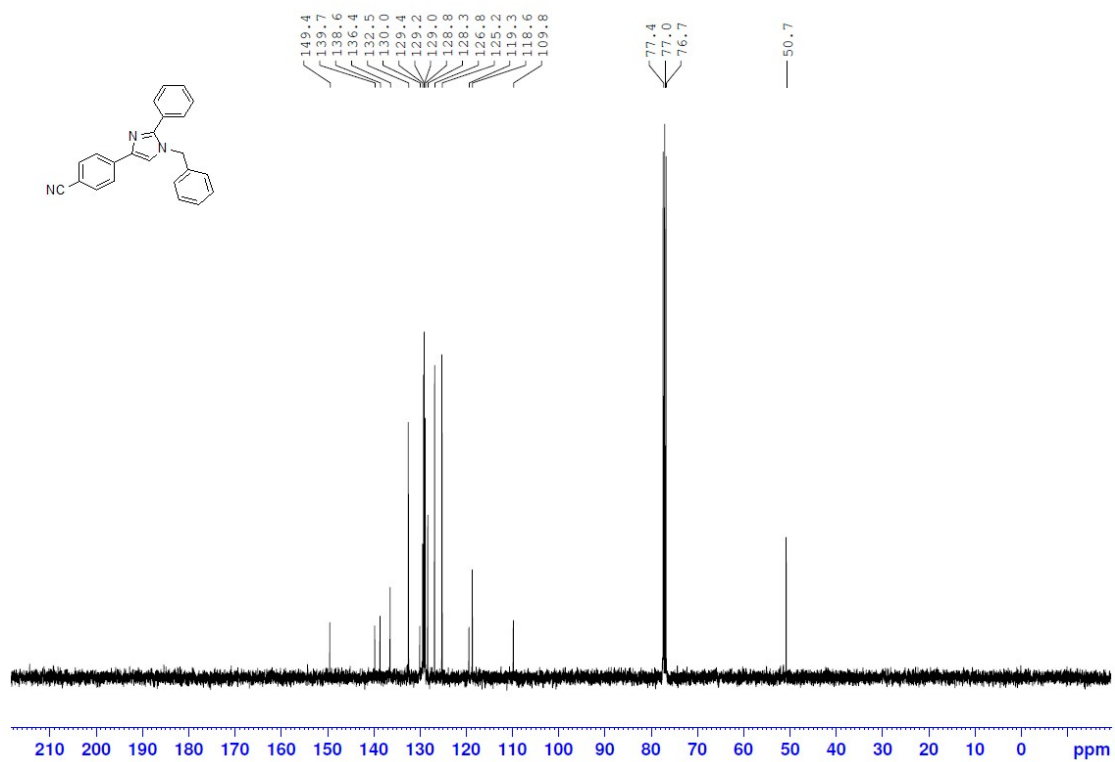

<sup>13</sup>C NMR of 4ae

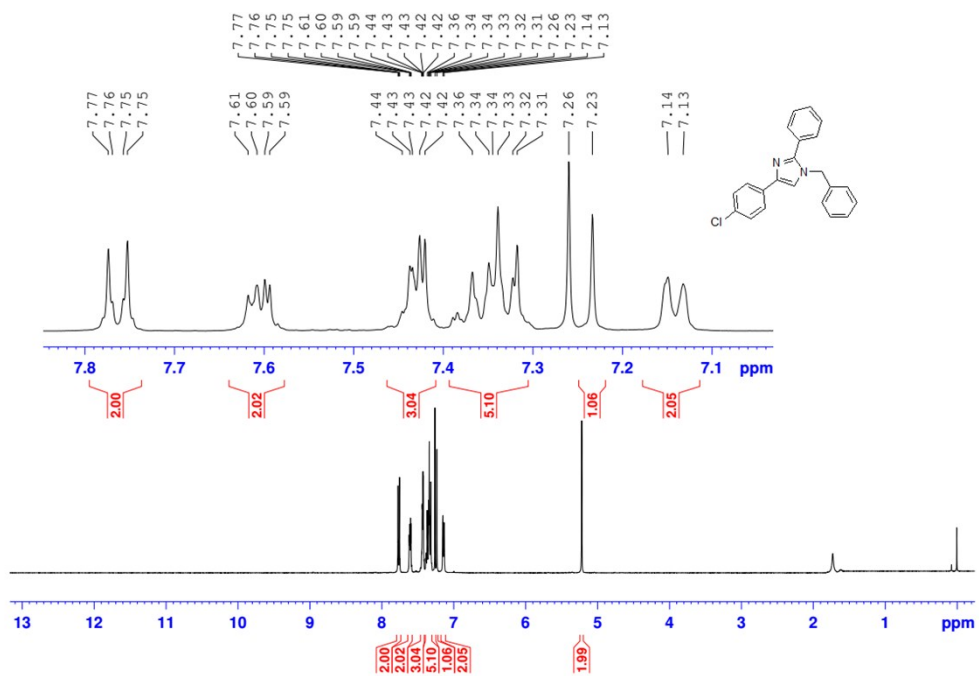

<sup>1</sup>H NMR of 4af

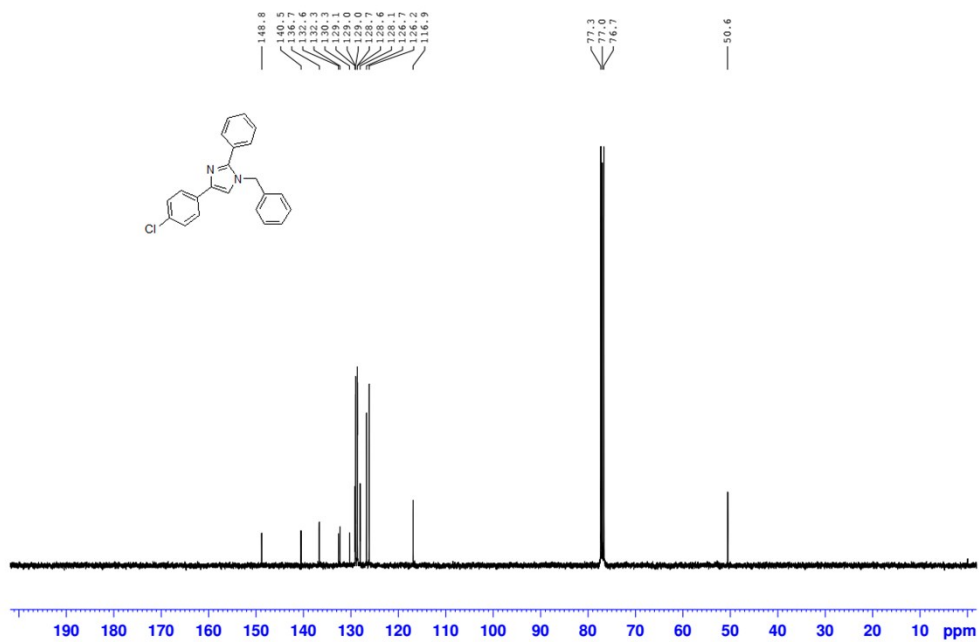

<sup>13</sup>C NMR of 4af

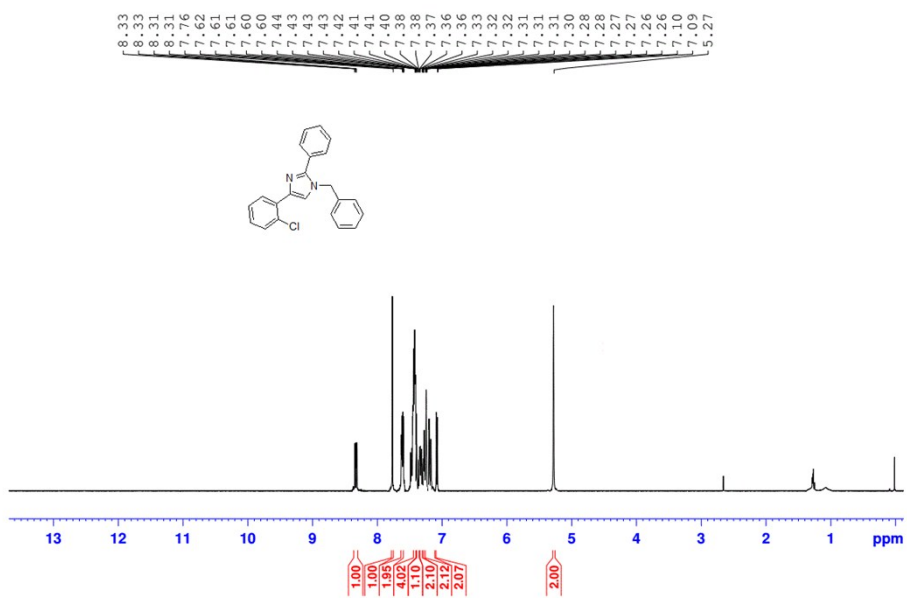

<sup>1</sup>H NMR of 4ag

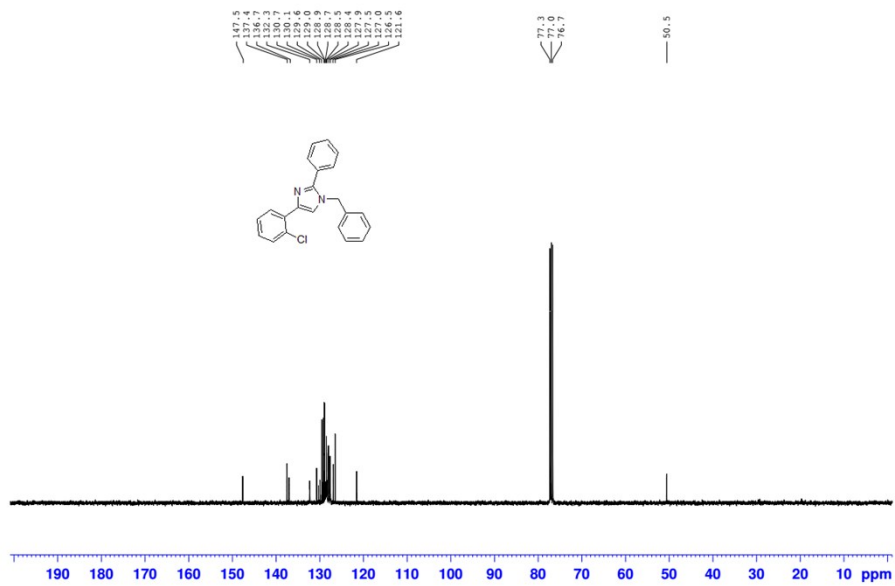

<sup>13</sup>C NMR of 4ag

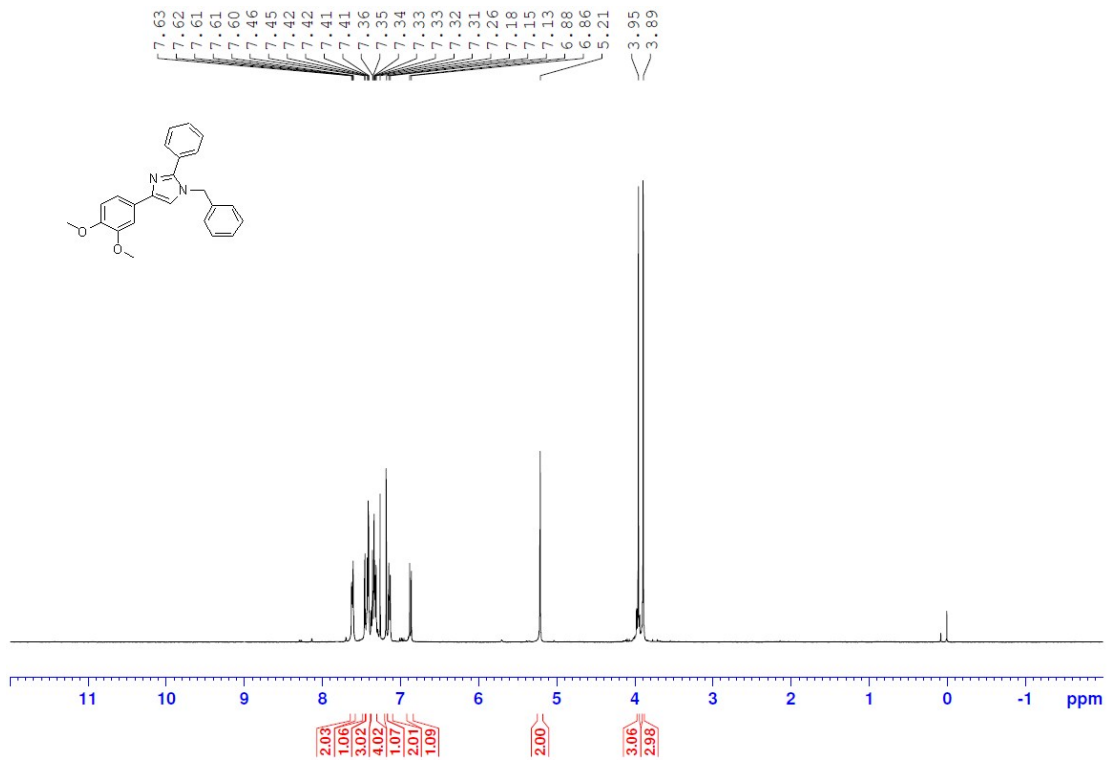

<sup>1</sup>H NMR of 4ah

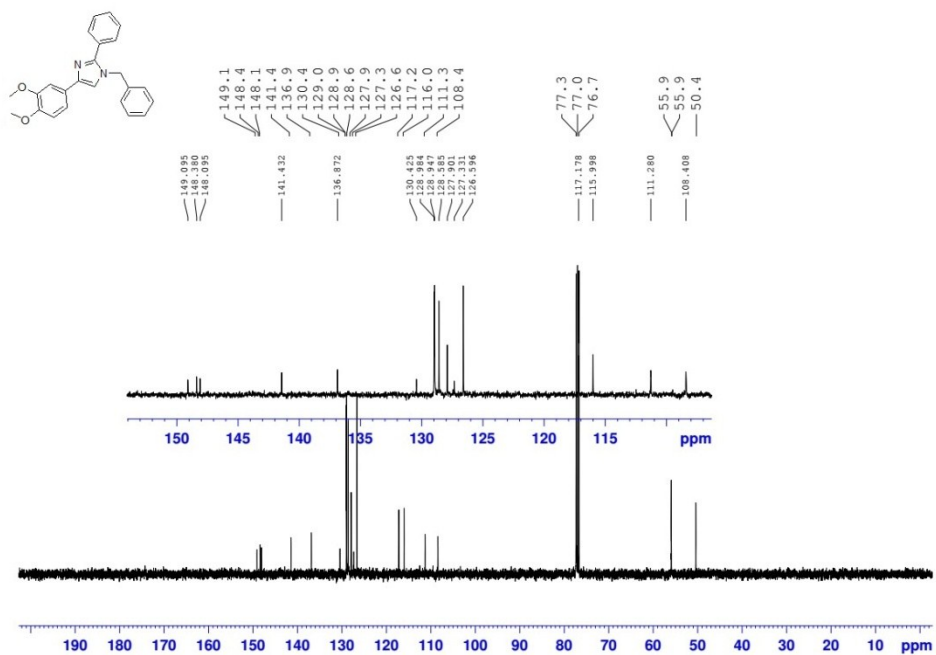

<sup>13</sup>C NMR of 4ah

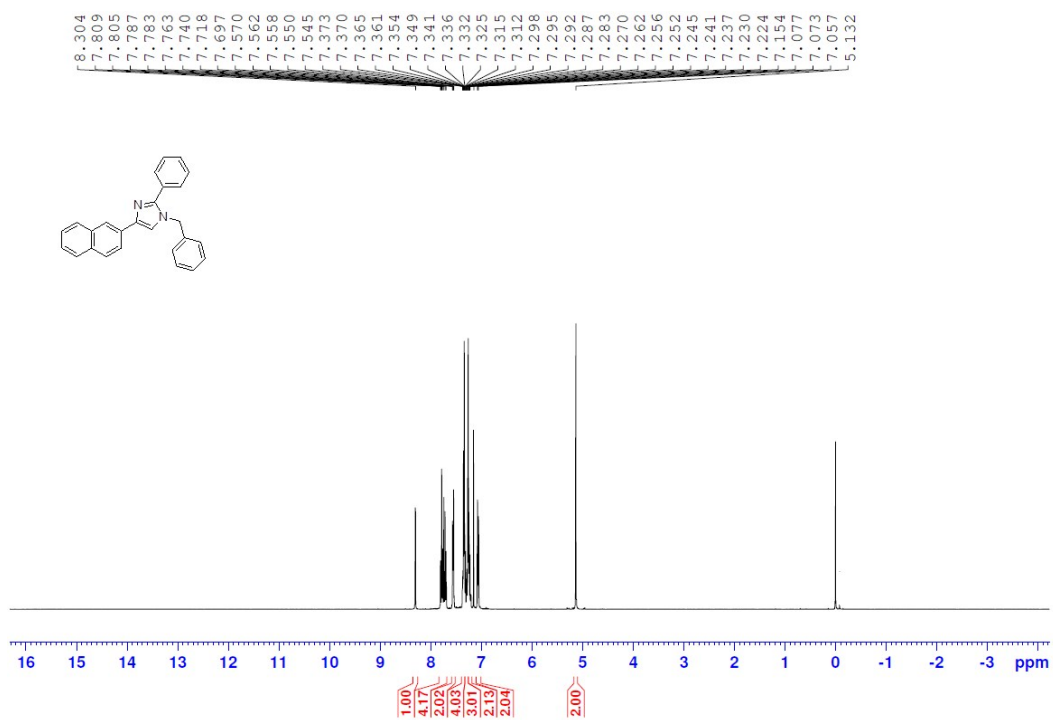

<sup>1</sup>H NMR of 4ai

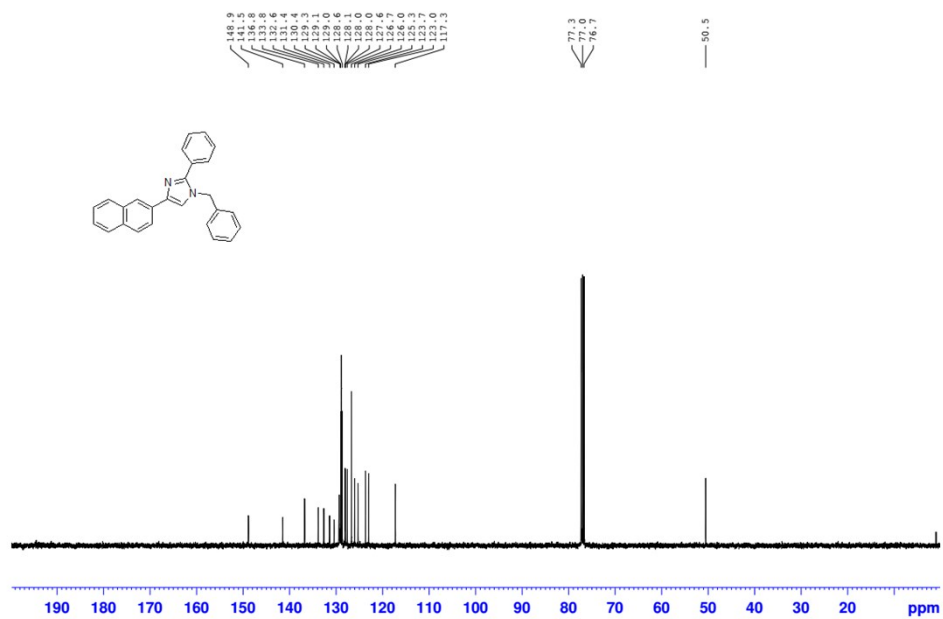

$^{13}\text{C}$  NMR of 4ai

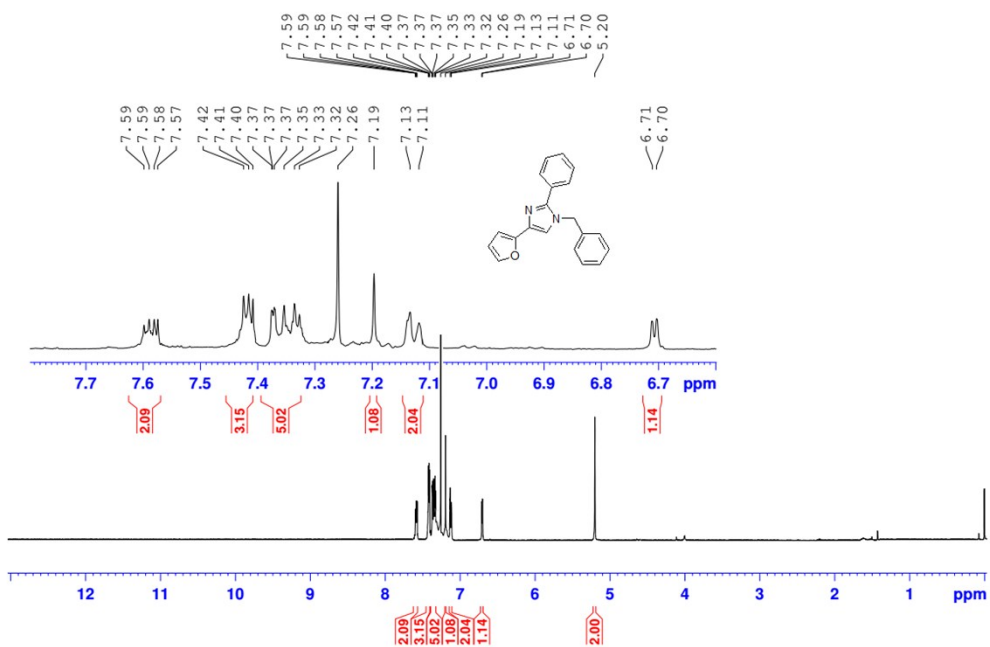

$^1\text{H}$  NMR of 4aj



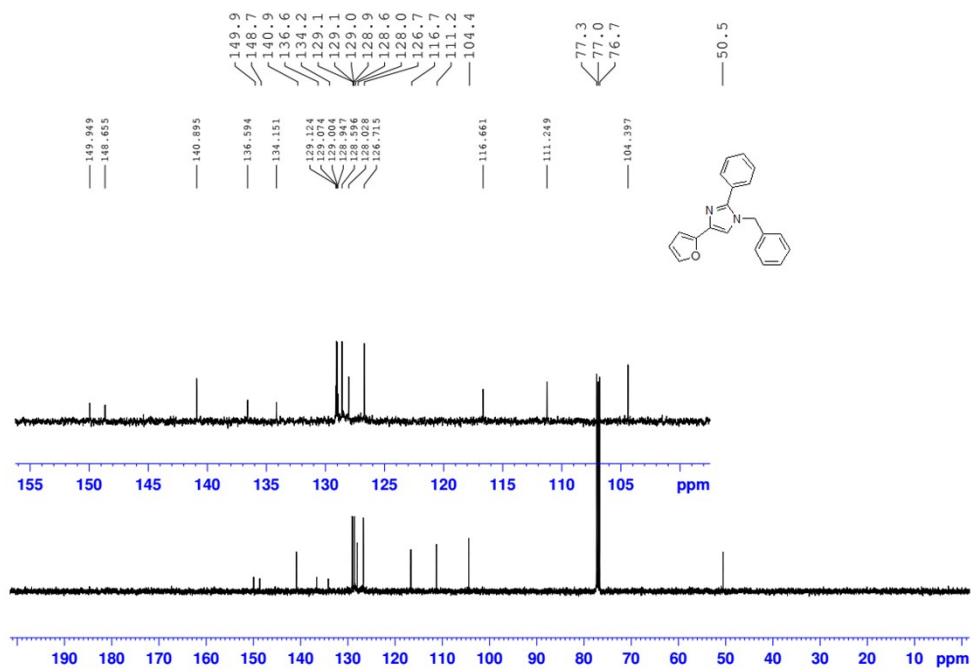

<sup>13</sup>C NMR of 4aj

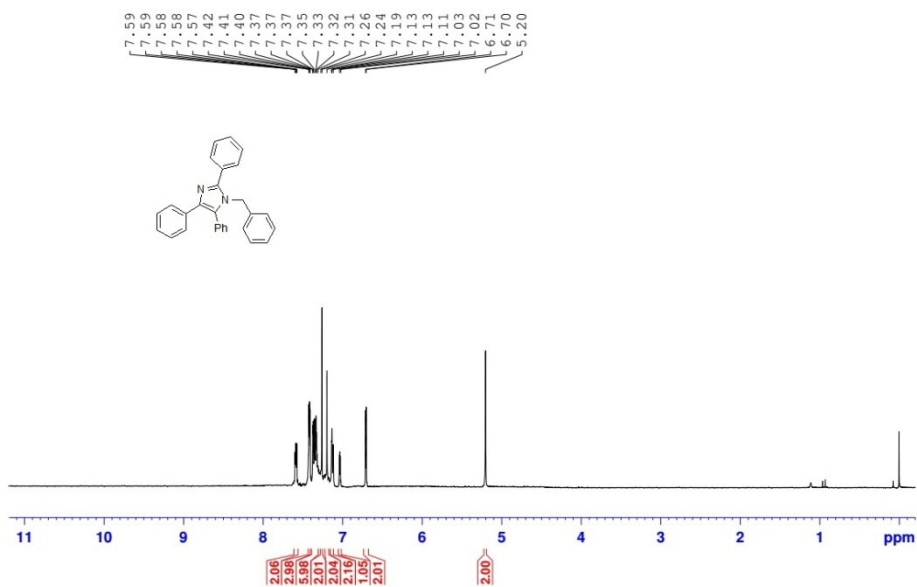

<sup>1</sup>H NMR of 4ak

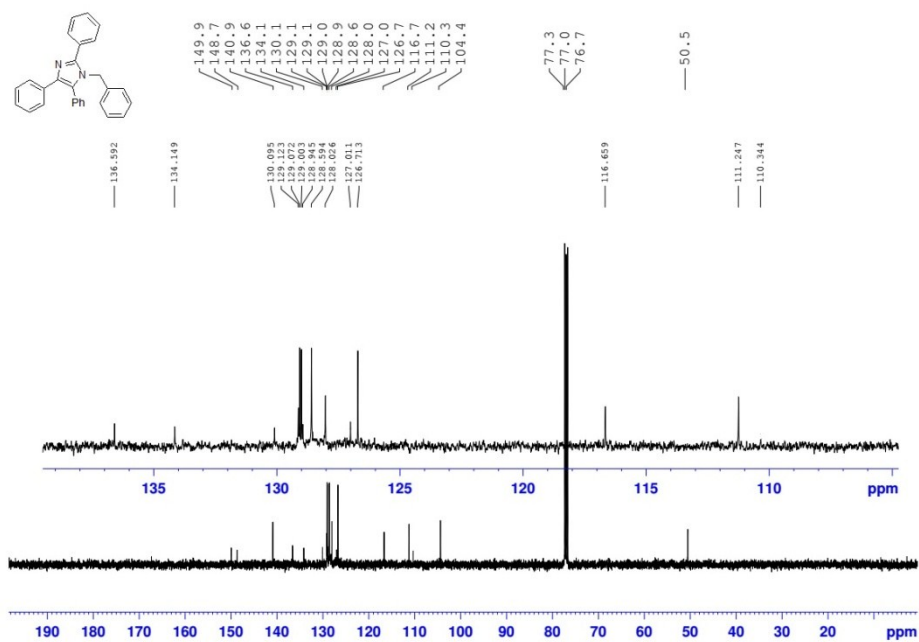

**<sup>13</sup>C NMR of 4ak**

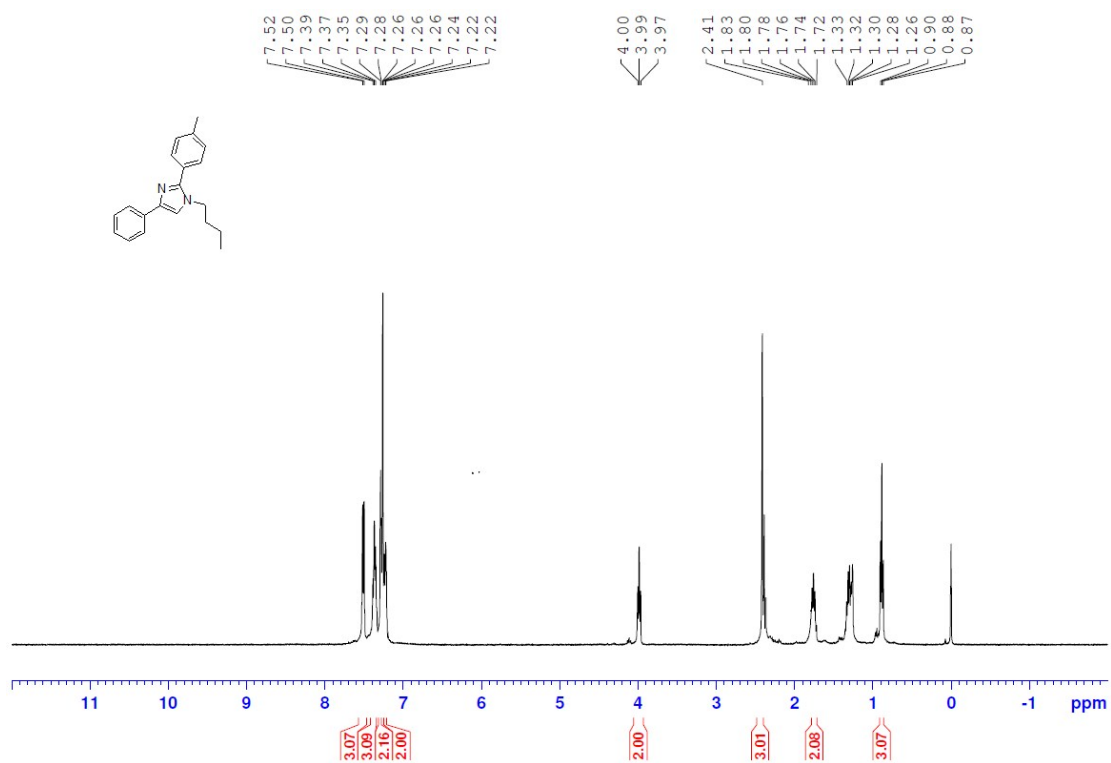

**<sup>1</sup>H NMR of 4ba**

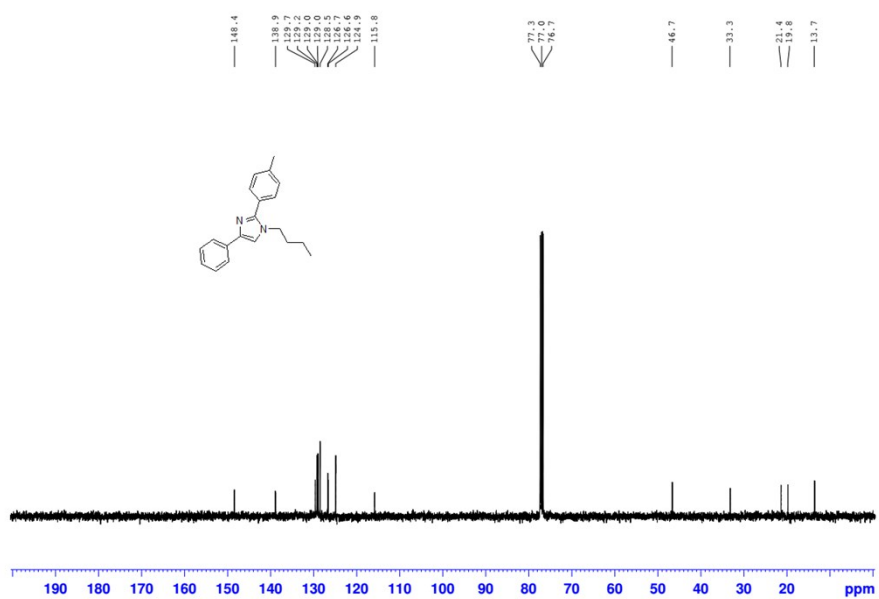

$^{13}\text{C}$  NMR of 4ba

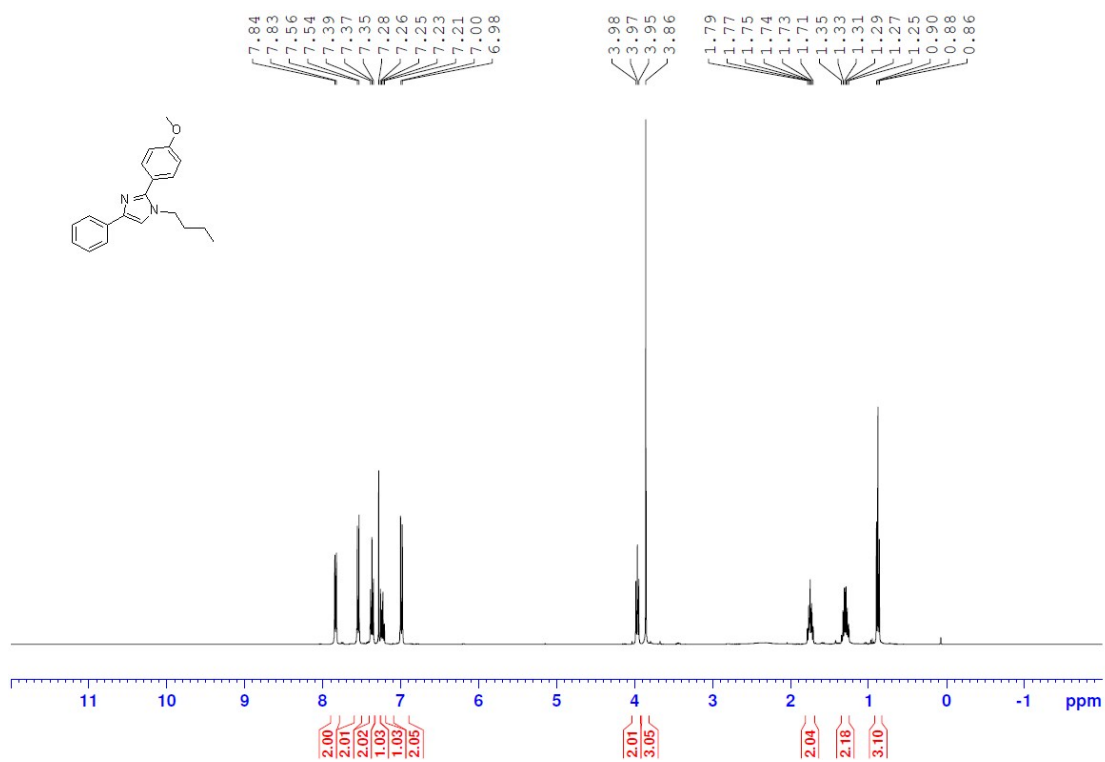

$^1\text{H}$  NMR of 4ca

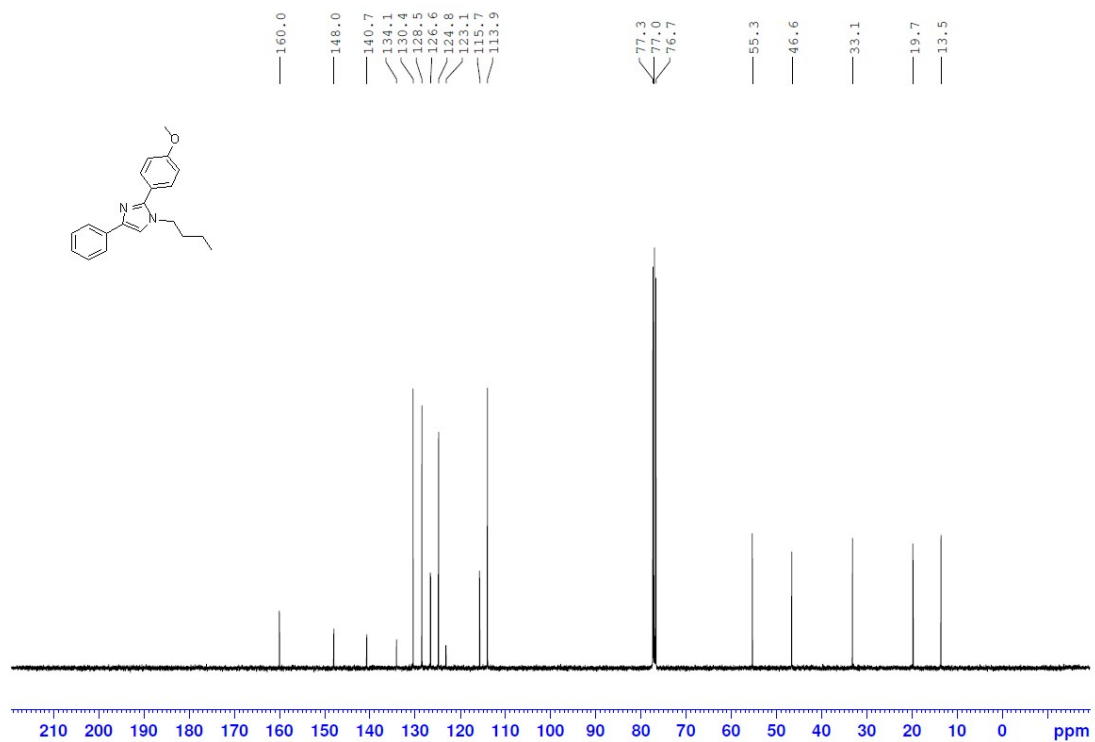

$^{13}\text{C}$  NMR of 4ca

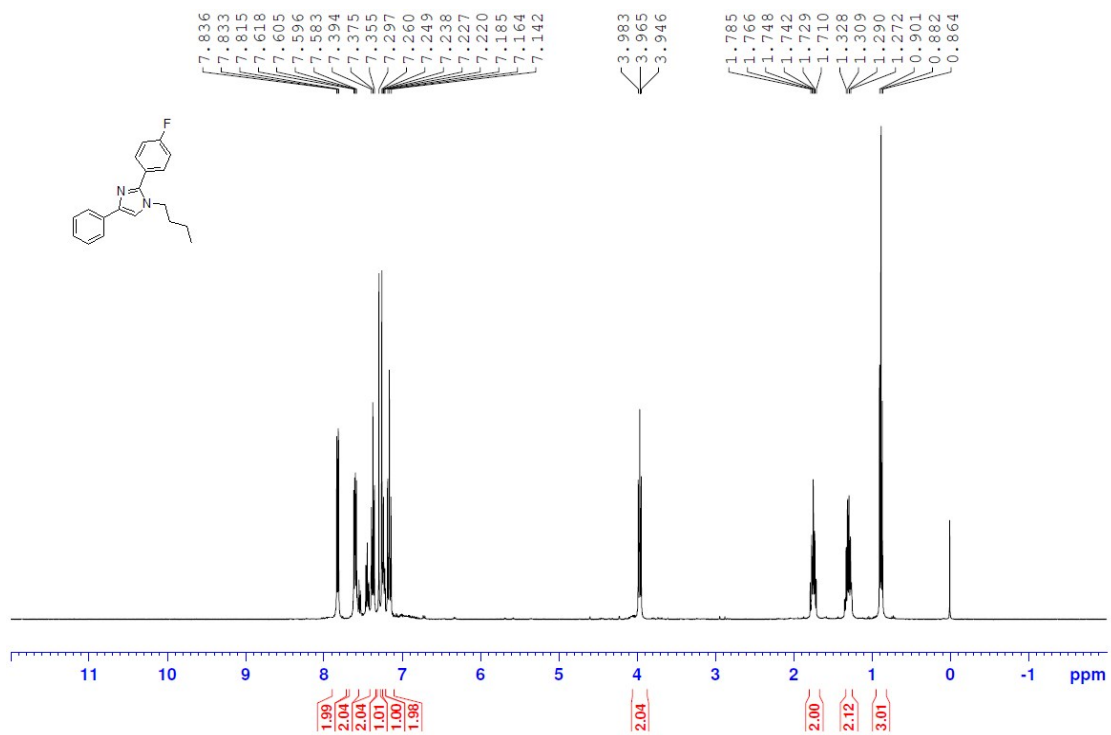

$^1\text{H}$  NMR of 4da

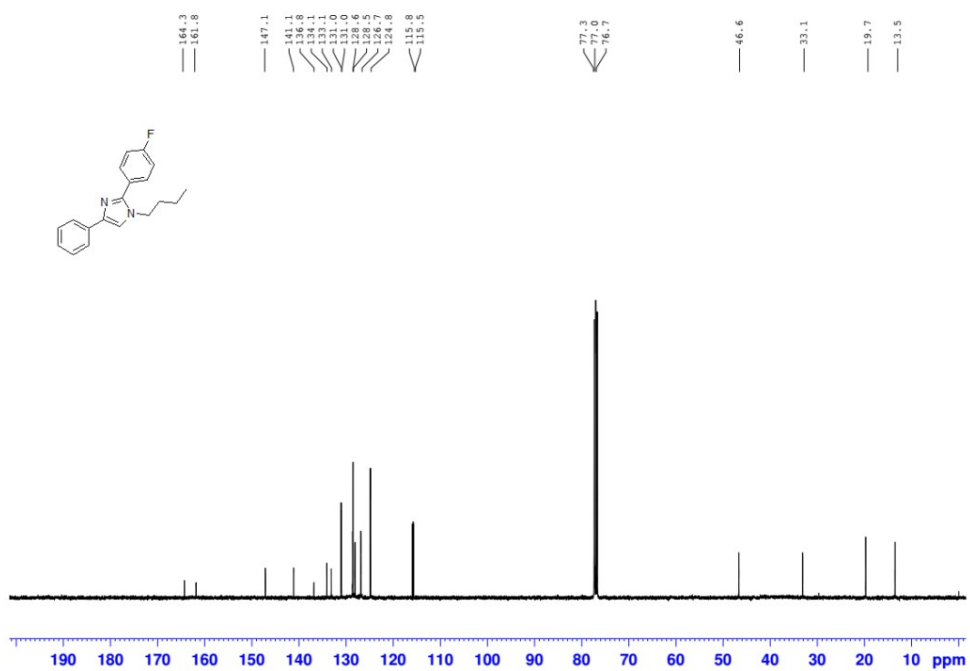

<sup>13</sup>C NMR of 4da

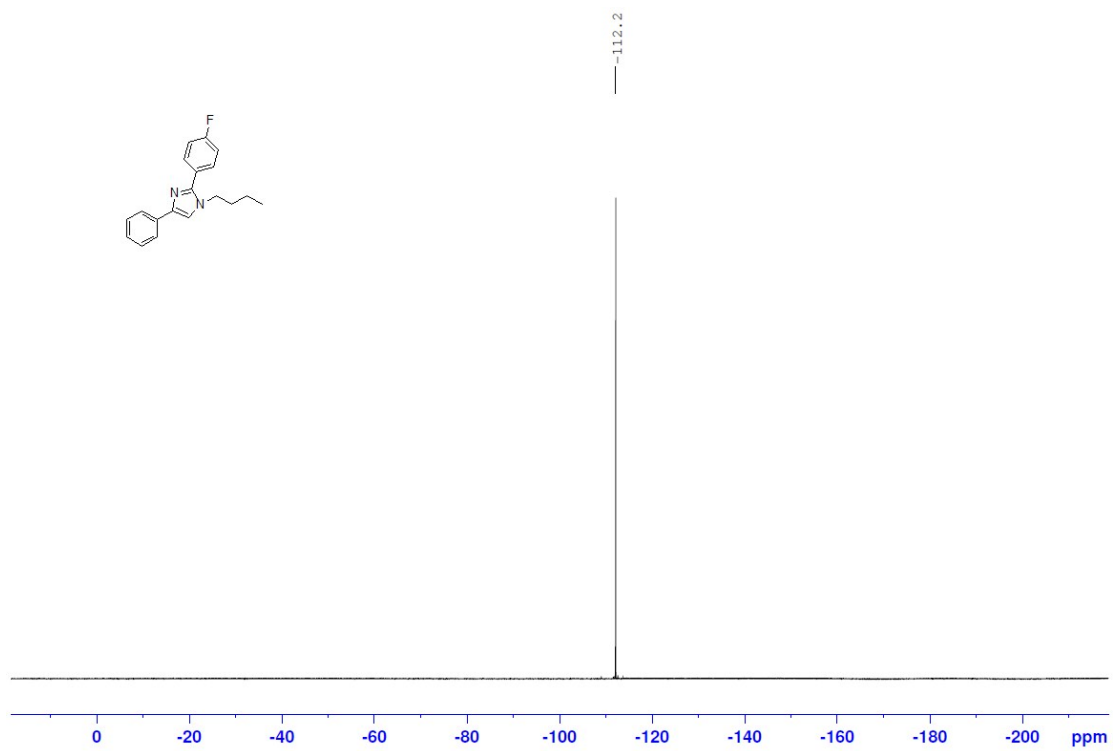

<sup>19</sup>F NMR of 4da

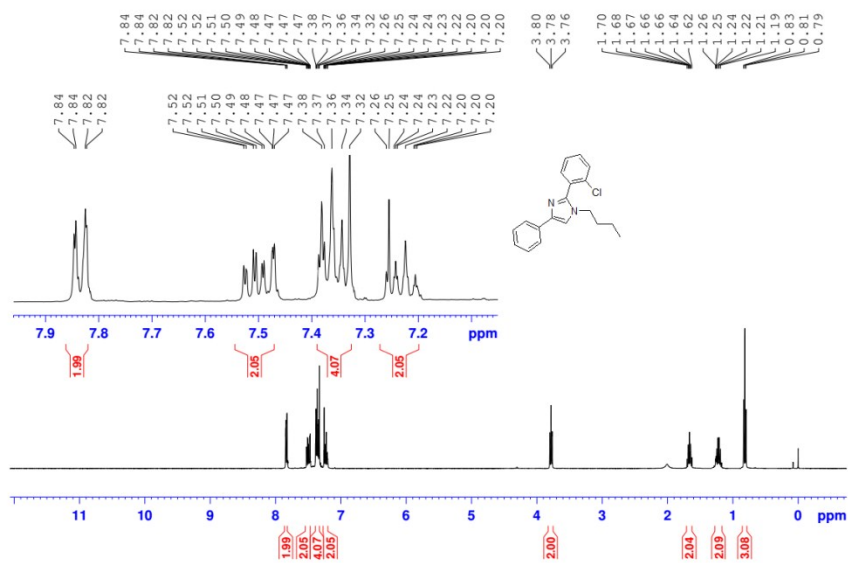

<sup>1</sup>H NMR of 4ea

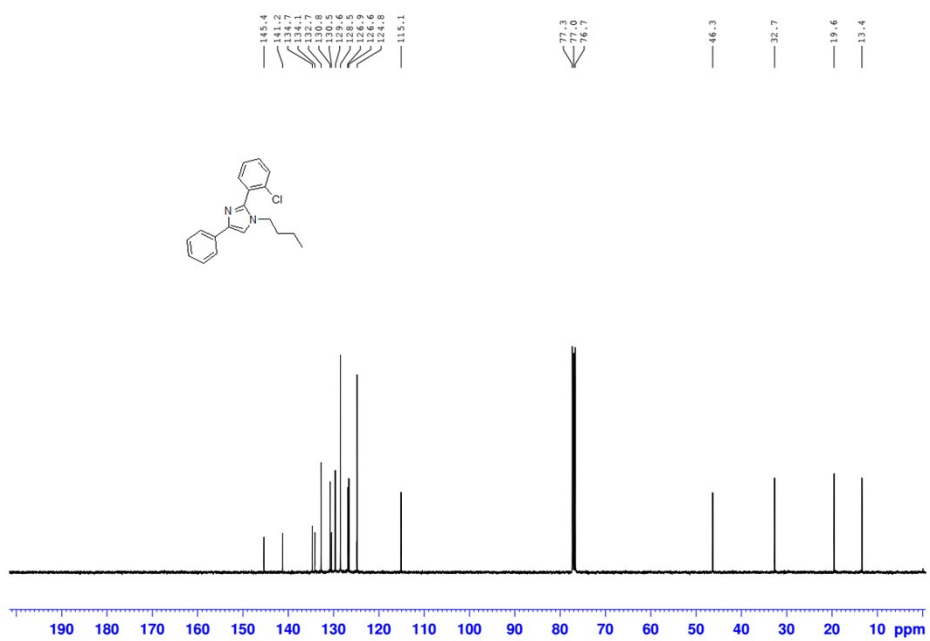

<sup>13</sup>C NMR of 4ea

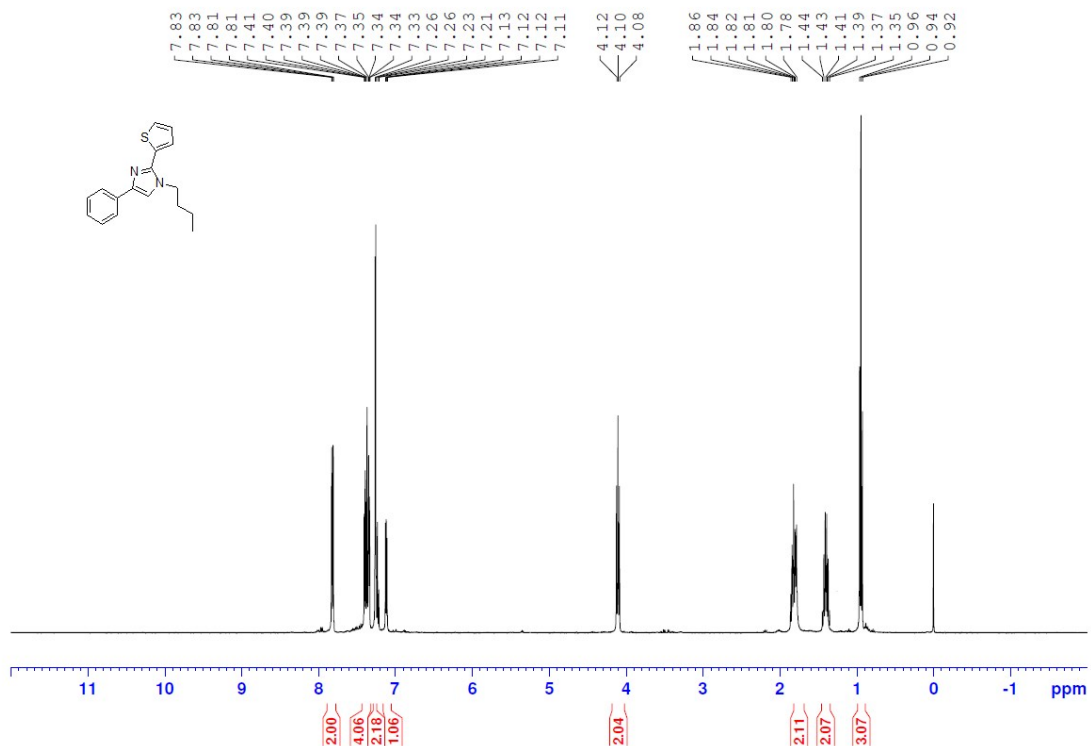

<sup>1</sup>H NMR of 4fa

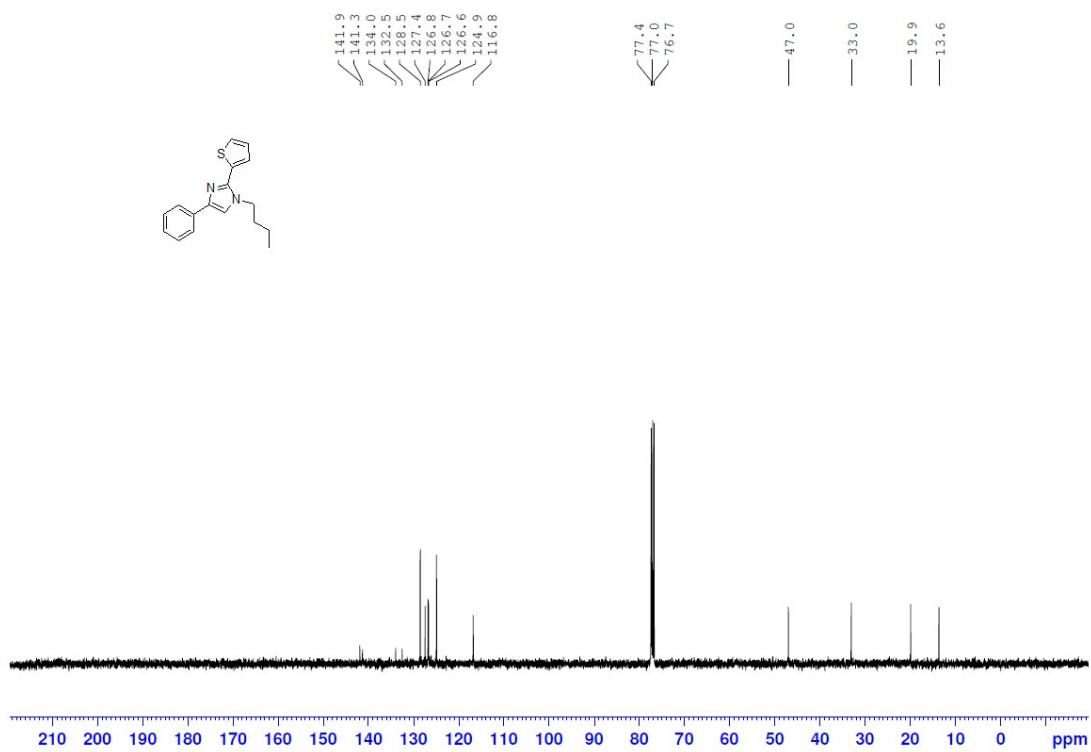

<sup>13</sup>C NMR of 4fa

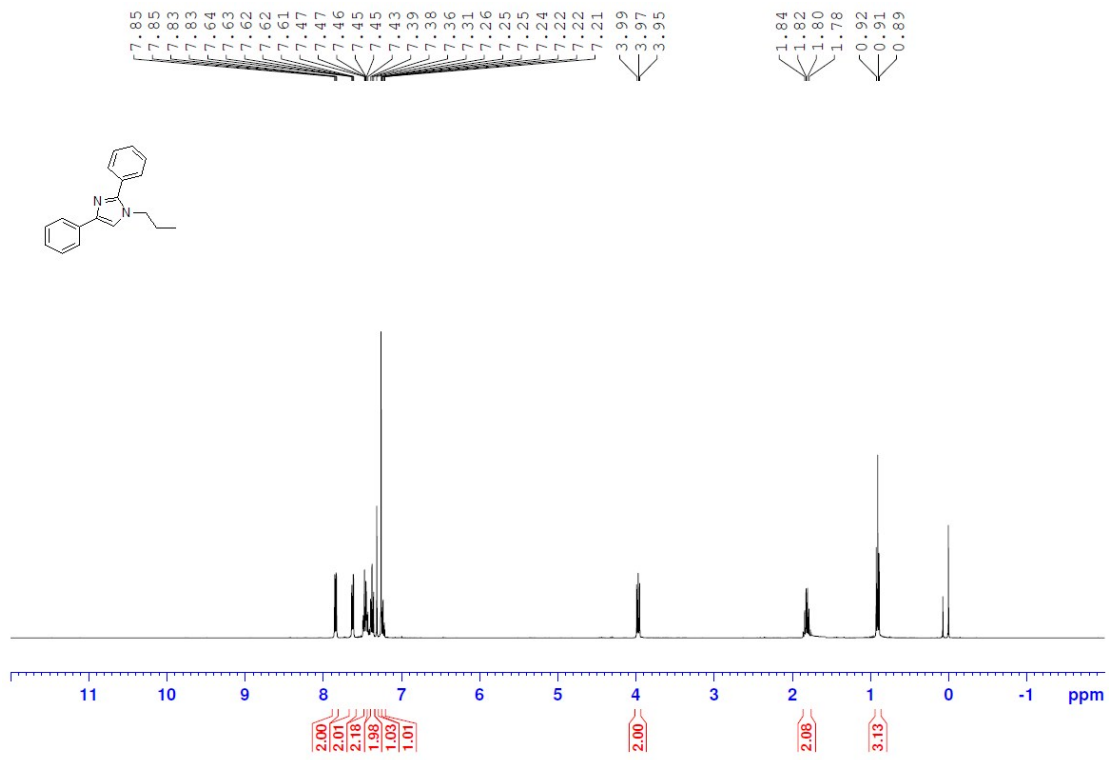

**<sup>1</sup>H NMR of 4ga**

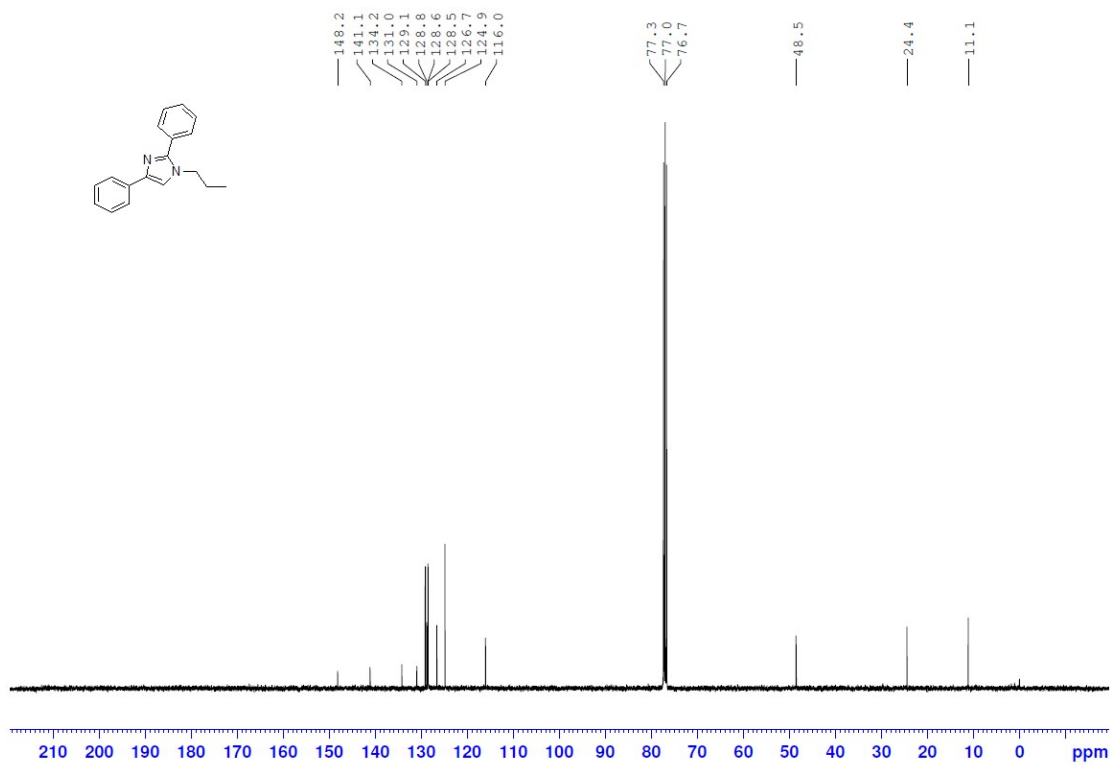

**<sup>13</sup>C NMR of 4ga**



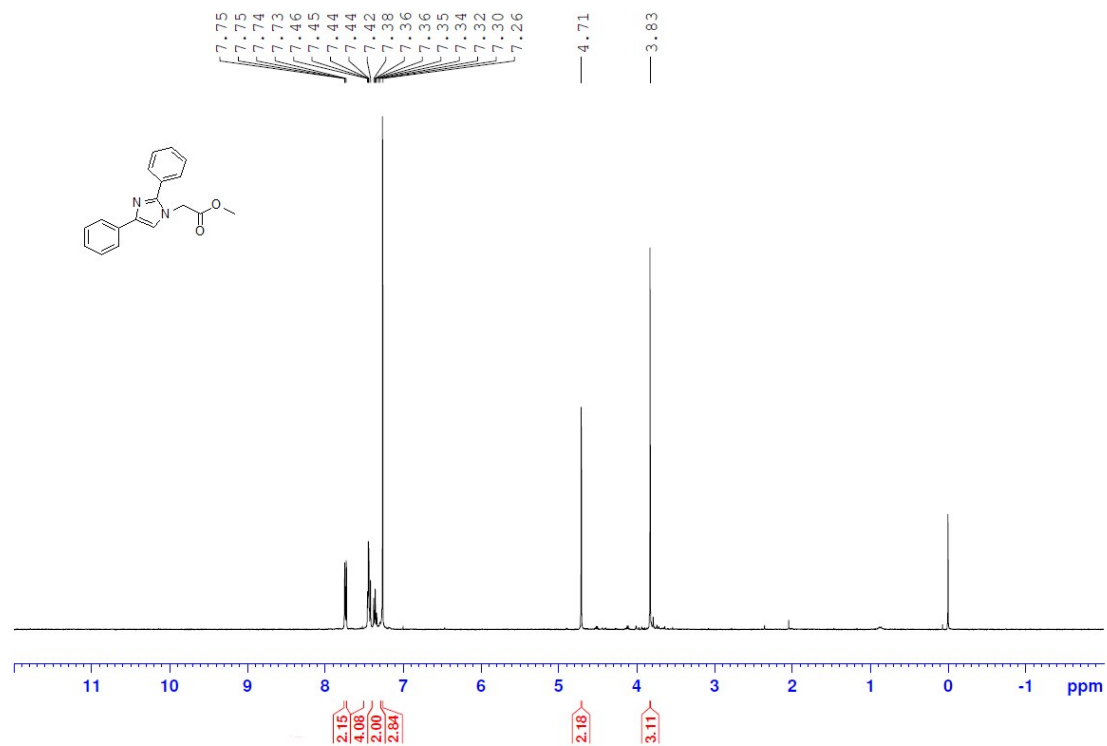

<sup>1</sup>H NMR of 4ha

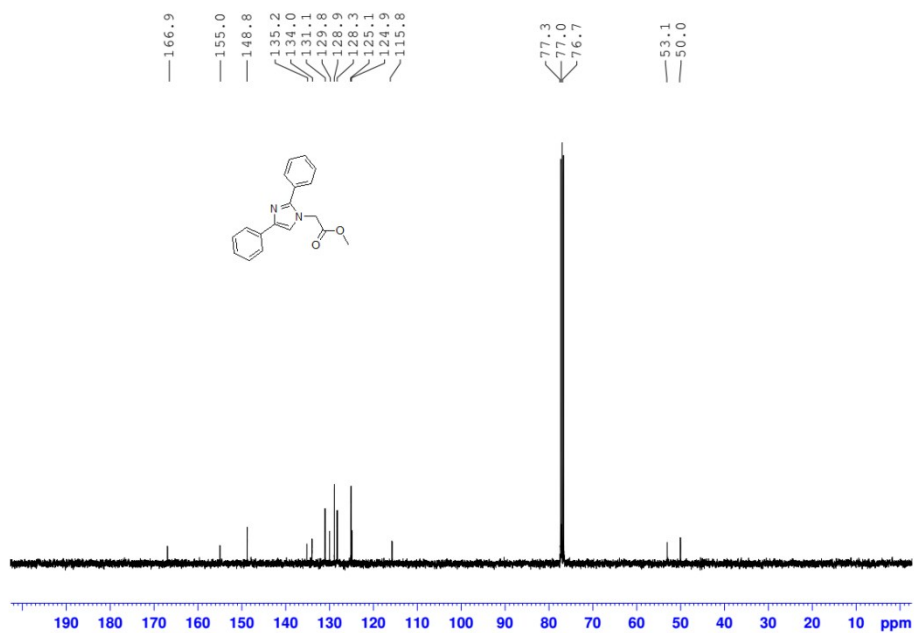

<sup>13</sup>C NMR of 4ha

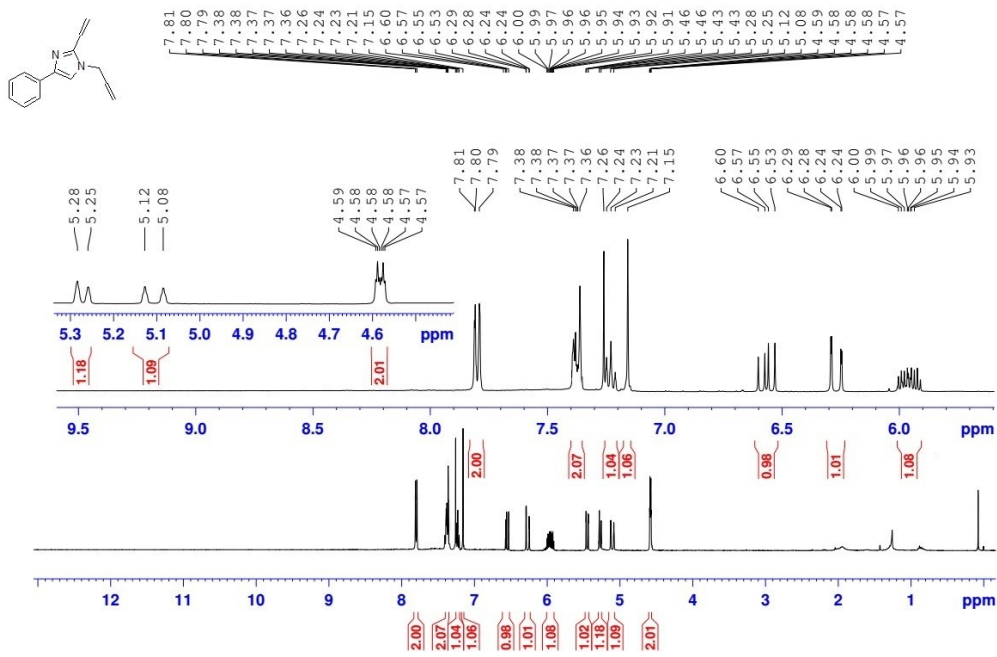

**<sup>1</sup>H NMR of 4ia**

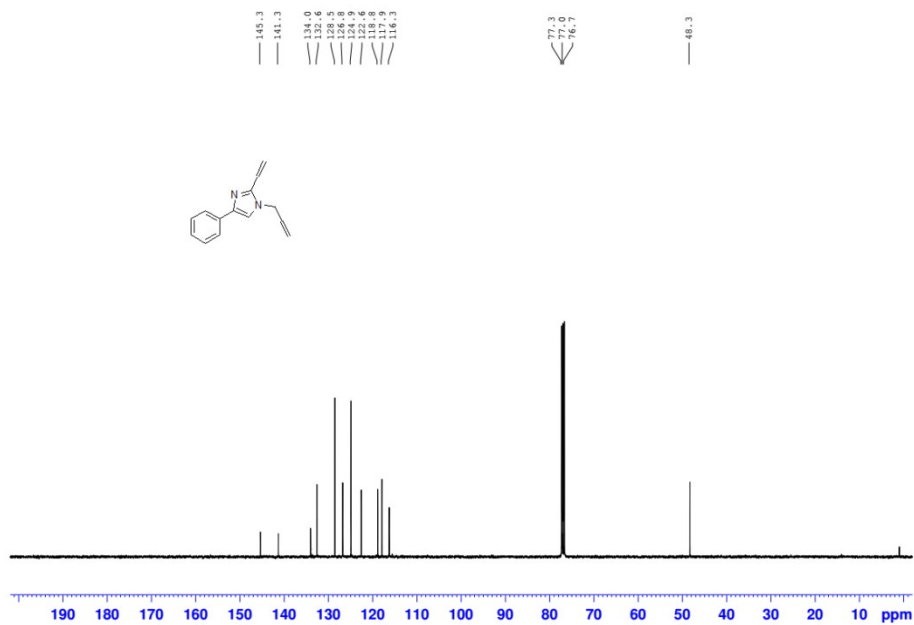

**<sup>13</sup>C NMR of 4ia**

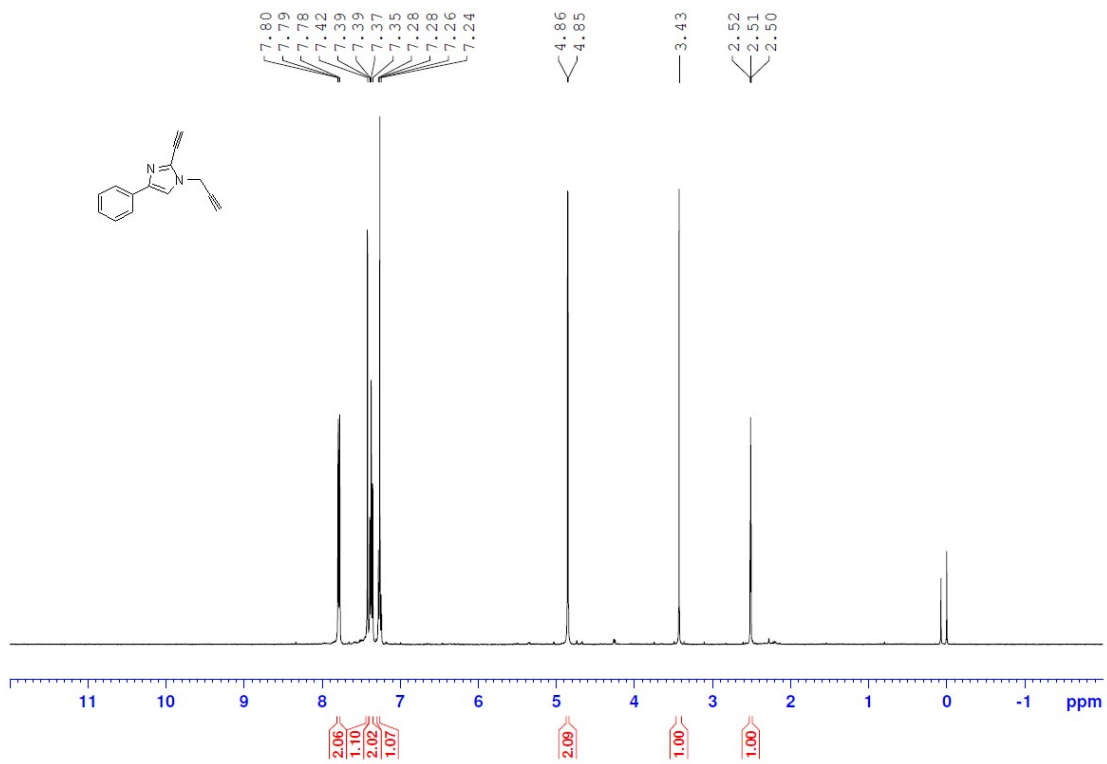

$^1\text{H NMR}$  of 4ja

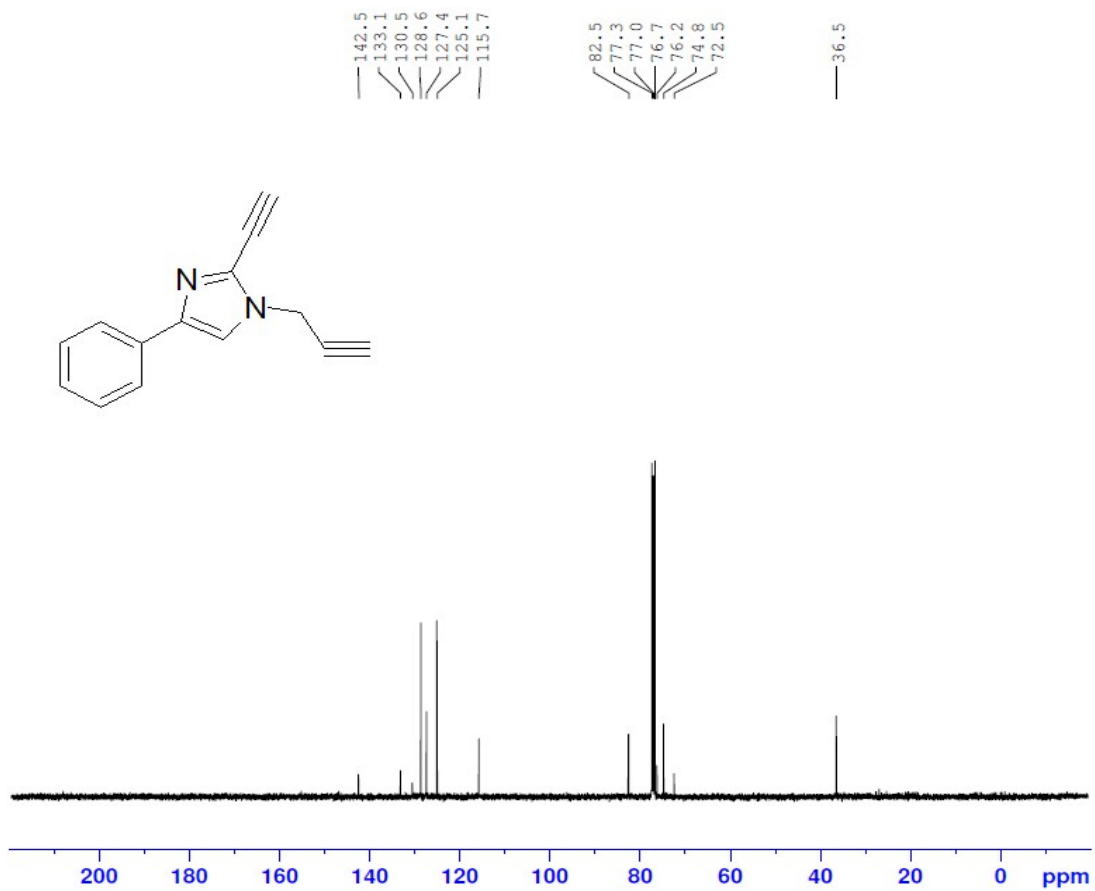

$^{13}\text{C NMR}$  of 4ja
